# Supplementary material for: Retinoic Acid Is Required for Neural Stem and Progenitor Cell Proliferation in the Adult Hippocampus
Source: PubMed Central journal article supplement — Stem Cell Reports. 2018 May 24;10(6):1705–20. doi: 10.1016/j.stemcr.2018.04.024 (PMC5993652; doi:10.1016/j.stemcr.2018.04.024), 2018-05-24
Supplement: mmc10.pdf [file mmc10.pdf]

# Retinoic Acid Is Required for Neural Stem and Progenitor Cell Proliferation in the Adult Hippocampus

Swati Mishra,<sup>1</sup> Kathleen K. Kelly,<sup>1</sup> Nicole L. Rumian,<sup>1</sup> and Julie A. Siegenthaler<sup>1,\*</sup>

<sup>1</sup>Department of Pediatrics, Section of Developmental Biology, University of Colorado, School of Medicine, 12800 East 19th Avenue MS-8313, Aurora, CO 80045, USA

\*Correspondence: [julie.siegenthaler@ucdenver.edu](mailto:julie.siegenthaler@ucdenver.edu)

<https://doi.org/10.1016/j.stemcr.2018.04.024>

## SUMMARY

Neural stem and precursor cell (NSPC) proliferation in the rodent adult hippocampus is essential to maintain stem cell populations and produce new neurons. Retinoic acid (RA) signaling is implicated in regulation of adult hippocampal neurogenesis, but its exact role in control of NSPC behavior has not been examined. We show RA signaling in all hippocampal NSPC subtypes and that inhibition of RA synthesis or signaling significantly decreases NSPC proliferation via abrogation of cell-cycle kinetics and cell-cycle regulators. RA signaling controls NSPC proliferation through hypoxia inducible factor-1 $\alpha$  (HIF1 $\alpha$ ), where stabilization of HIF1 $\alpha$  concurrent with disruption of RA signaling can prevent NSPC defects. These studies demonstrate a cell-autonomous role for RA signaling in hippocampal NSPCs that substantially broadens RA's function beyond its well-described role in neuronal differentiation.

## INTRODUCTION

The generation of new neurons in the adult brain is required for certain aspects of learning, memory, and emotional processing (Deng et al., 2009; Revest et al., 2009). Adult neurogenesis is driven by neural stem and progenitor cells (NSPCs) located in the hippocampus, and impairments to these cells are associated with human neuropsychiatric and neurodegenerative disorders (Höglinger et al., 2004; Crews et al., 2010; Perry et al., 2012; Gomez-Nicola et al., 2014). NSPCs are located in the subgranular zone (SGZ) of the hippocampal dentate gyrus (DG) and generate neurons that reside in the granule cell layer and integrate into the hippocampal circuitry (Gage et al., 1998; van Praag et al., 2002). Cell extrinsic factors in the SGZ microenvironment critically regulate NSPC behavior and are produced both locally and from *outside* the niche. Cell extrinsic factors contributing to the NSPC microenvironment can be systemic factors delivered via blood vessels (Villeda et al., 2011, 2014; Villeda and Wyss-Coray, 2013) or cerebrospinal fluid factors that cross into the subventricular zone (SVZ) niche at the ventricular surface (Silva-Vargas et al., 2016). Factors delivered at these niche interfaces influence neural stem cell (NSC) maintenance and neurogenesis. These discoveries broaden the repertoire of signals that could influence the NSC niche and highlight how far these signals could travel.

Retinoic acid (RA) is a bioactive metabolite of vitamin A that is present in the NSPC hippocampal microenvironment with a well-established role in developmental neurogenesis (Maden, 2007). While RA signaling is robust in the adult DG (Misner et al., 2001; Wagner et al., 2002; Goodman et al., 2012), RA is not synthesized by neural cells

in the rodent hippocampus (Goodman et al., 2012). The meninges lining the ventral hippocampus express the retinol and retinal dehydrogenases required to produce RA and are the likely source of RA for the rodent hippocampus (Wagner et al., 2002; Goodman et al., 2012). Several studies suggest an important role for RA in adult hippocampal neurogenesis but show conflicting results. For example, rats on a chronic vitamin A deficient (VAD) diet, which prevents RA production systemically, showed decreased SGZ cell proliferation and diminished neurogenesis (Bonnet et al., 2008). Mice on a VAD diet also showed diminished neurogenesis (fewer proliferating neuroblasts, newborn granule cells, and neurons) but did not show reduced SGZ cell proliferation (Jacobs et al., 2006). A third study showed multi-week exposure to exogenous RA diminished cell proliferation in SGZ (Crandall et al., 2004). In addition to differing reports of RA's action on hippocampal NSPCs, no studies have looked at the cell-autonomous function of RA signaling in different NSPC subtypes and, as yet, there is no downstream mechanism for RA's action on NSPCs.

To examine the function of RA in adult neurogenesis, we disrupted RA synthesis systemically or RA signaling specifically in adult NSPCs. Our studies reveal an important role for RA in promoting NSPC proliferation through regulation of cell-cycle kinetics and cell-cycle proteins. We identified hypoxia inducible factor-1 $\alpha$  (HIF1 $\alpha$ ) and its transcriptional target vascular endothelial growth factor-A (VEGFA) as key mediators of RA control of NSPC behavior. Our findings regarding RA are a significant departure from the dogma that RA acts mainly to promote neuronal differentiation and implicate RA as a hypoxia-independent regulator of HIF1 $\alpha$ -VEGFA in the adult hippocampal niche.

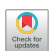

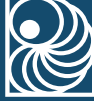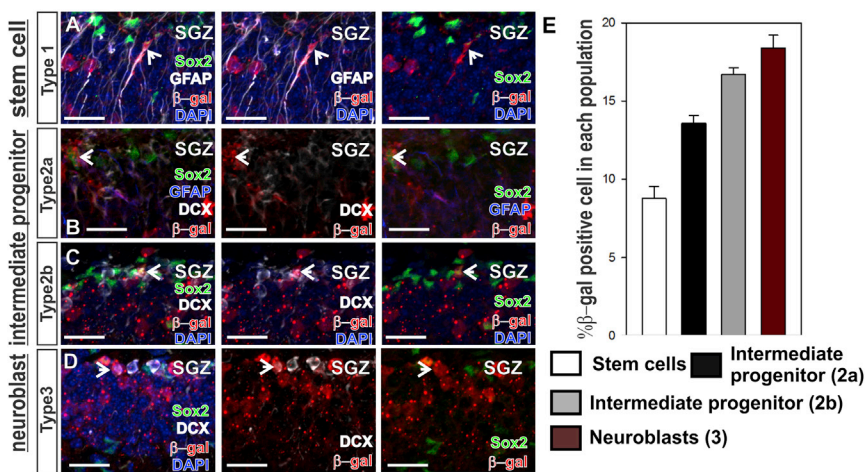

**Figure 1. Retinoic Acid Signaling in Adult Hippocampal NSPCs**

(A–D) Arrows indicate β-gal (red) in subgranular zone (SGZ) of *RARE-lacZ* mice in (A) type 1 stem cells SOX2+ (green) and GFAP+ (white), (B) type 2a progenitors SOX2+GFAP–DCX– (GFAP, blue; DCX, white), (C) type 2b progenitors SOX2+DCX+, and (D) type 3 progenitors SOX2–DCX+. Scale bar, 20 μm.

(E) Quantification of %β-gal-positive NSPCs. Data represented as means ± SEM, n = 3.

## RESULTS

### RA Signaling in Adult Hippocampal NSPCs

To examine RA signaling in NSPCs we used adult *RARE-LacZ* reporter mice where β-galactosidase protein (β-gal) expression is driven by multiple copies of an RA response element (RARE) (Rossant et al., 1991). β-gal+ cells indicate ongoing or recent RA signaling (β-gal protein is very stable, half-life of 24–48 hr; Gonda et al., 1989; McCutcheon et al., 2010). Co-labeling of β-gal with NSPC subtype specific markers was used to assess active RA signaling in each subtype. NSCs (type 1) were identified as SOX2+/GFAP+ (Figure 1A), type 2a progenitors were identified as SOX2+/GFAP–/DCX– (Figure 1B), type 2b progenitors were identified as SOX2+/DCX+ (Figure 1C), and type 3 neuroblasts were identified as SOX2–/DCX+ (Figure 1D) (Ferri et al., 2004; Kempermann et al., 2004; Komitova and Eriksson, 2004; Suh et al., 2007, 2009; Lugert et al., 2010; Bonaguidi et al., 2011; Ashton et al., 2012). We observed 8.8% of type 1 stem cells, 13.6% type 2a progenitors, 16.7% type 2b progenitors, and 18.4% type 3 progenitors were β-gal positive (Figure 1E, Table S2). Hence, at any given point, a portion of each NSPC subtype has RA signaling.

### RA Stimulates NSPC Proliferation and HIF1α Mediates This Effect *In Vitro*

RA is well known to induce neuronal differentiation and, while recent studies implicate RA in regulating NSPC proliferation (Bonnet et al., 2008; Goodman et al., 2012; Takamura et al., 2017), the effect of RA on adult hippocampal NSPC proliferation remains largely unexplored. We treated rat hippocampal NSPC cultures with vehicle, RA, or RA + pan-RAR antagonist for 24 hr then pulsed with 5-ethynyl-2'-deoxyuridine (EdU) to calculate the labeling index (LI) as a readout of NSPC proliferation. RA treatment increased the LI and this effect was blocked by pan-RAR antagonist

co-treatment (Figure 2A, Table S3). These data show RA is sufficient to stimulate hippocampal NSPC proliferation *in vitro*.

Based on published reports and our previous work with RA in developmental neurogenesis, we suspected that RA may increase adult NSPC proliferation by stimulating HIF1α and its downstream target VEGFA (Jin et al., 2002; Segi-Nishida et al., 2008; Mazumdar et al., 2010; Amati et al., 2010; Antequera et al., 2012; Fournier et al., 2012; Kirby et al., 2015; Mishra et al., 2016). RA treatment of NSPC cultures increased HIF1α gene (Figure 2B; Table S3) and protein (Figure 2C; Table S3) expression, an effect blocked by pan-RAR antagonist treatment. Gene expression and protein levels of HIF1α target, VEGFA, showed a similar trend (Figures 2D and 2E; Table S3). Treatment with actinomycin D (a transcriptional inhibitor) resulted in no significant difference in HIF1α gene (Figure 2F; Table S3) or protein (Figure 2G; Table S3) expression between treatments. This suggests that RA likely increases HIF1α gene expression via transcription. We also tested if RA stimulation of HIF1α and VEGFA extended to astrocyte or neuronal cultures differentiated from NSPCs. RA did not alter HIF1α or VEGFA protein or gene expression in astrocytes, whereas neurons increased HIF1α and VEGFA in response to RA (Figure S1; Table S1). Altogether, our data identify RA as a regulator of HIF1α and VEGFA in adult hippocampal NSPCs and neurons.

To test if RA increases NSPC proliferation via HIF1α, cells were treated with vehicle, RA, echinomycin (inhibits HIF1α transcriptional activity; Kong et al., 2005), or RA + echinomycin. Echinomycin- and RA + echinomycin-treated cells showed significantly lower LI compared with vehicle (Figure 2H; Table S3). We next tested if RA increases NSPC proliferation via VEGFA. VEGFA stimulates NSPC proliferation via its kinase receptor VEGFR2 (Schänzer et al., 2004). We treated cells with vehicle, RA, VEGFR2 kinase inhibitor SU 5408, or RA + SU 5408. Cells treated with SU 5408

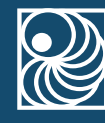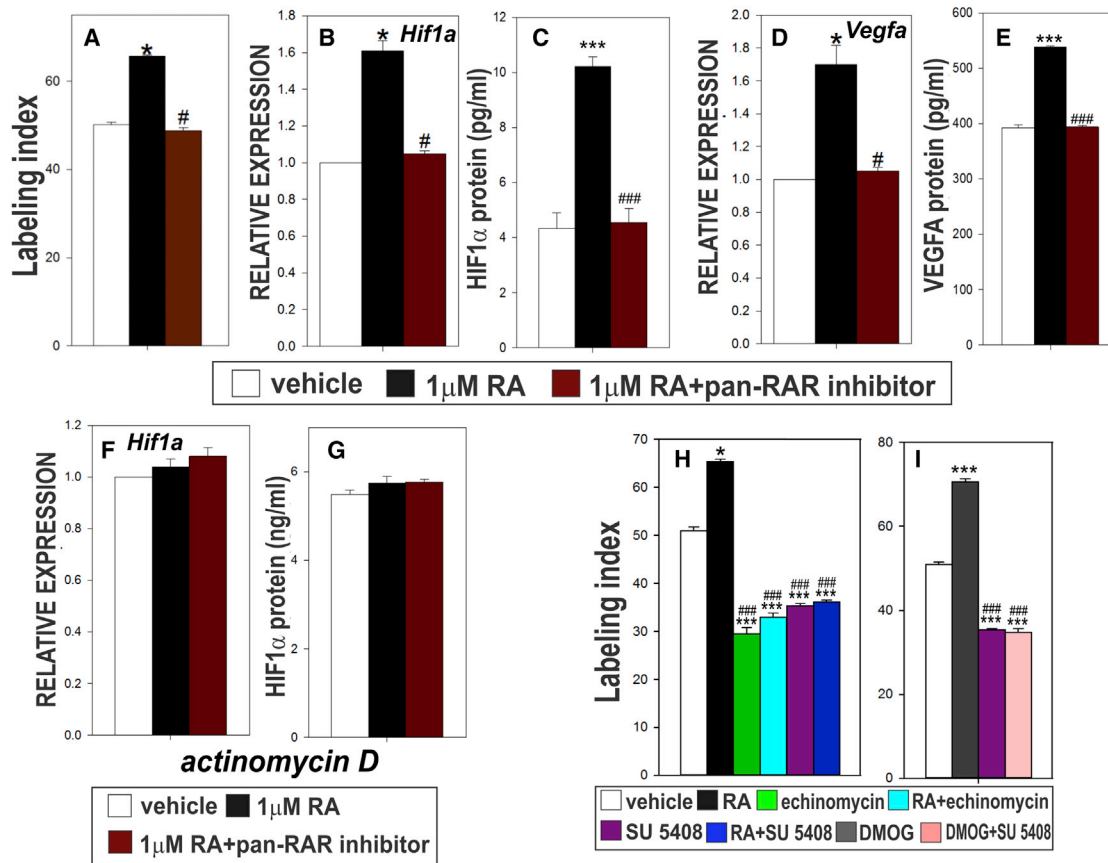

**Figure 2. RA Is Sufficient to Stimulate Adult Hippocampal NSPC Proliferation and HIF1 $\alpha$  Mediates This Effect *In Vitro***

(A–G) Quantification (A) of labeling index (LI) in cultures of NSPCs. RT-PCR for (B) *Hif1a* and (D) *Vegfa*. ELISA quantification of (C) HIF1 $\alpha$  and (E) VEGFA protein levels. Transcriptional inhibitor actinomycin D ablates RA-induced increase in (F) *Hif1a* gene expression and (G) HIF1 $\alpha$  protein level.

(H) Quantification of LI for NSPC cultures treated with vehicle, RA, echinomycin, SU 5,408, RA + echinomycin or RA + SU 5,408.

(I) Quantification of LI for NSPC cultures treated with vehicle, DMOG, SU 5408, or DMOG + SU 5408.

Data represented as means  $\pm$  SEM, \*# $p$   $\leq$  0.05, \*\*\*### $p$   $\leq$  0.001,  $n$  = 3.

and RA + SU 5408 had a significantly lower LI compared with vehicle (Figure 2H; Table S3). HIF1 $\alpha$  has many transcriptional targets therefore we tested if HIF1 $\alpha$  increases NSPC proliferation via VEGFA. We treated cells with dimethylallyl glycine (DMOG) (to elevate HIF1 $\alpha$  protein levels), SU 5408, or DMOG + SU 5408. DMOG stabilizes HIF1 $\alpha$  protein by inhibiting prolyl hydrolase activity, an enzyme that promotes HIF1 $\alpha$  degradation in normoxic conditions. DMOG increases HIF1 $\alpha$  protein levels in hippocampal neurospheres (Chatzi et al., 2015). DMOG treatment increased LI compared with vehicle-treated cells and this effect was blocked by SU 5408 co-treatment (Figure 2I; Table S3). Altogether, these NSPC proliferation studies show (1) RA requires HIF1 $\alpha$  and VEGFA signaling to increase NSPC proliferation in culture, and (2) VEGFA is likely the main target that mediates RA and HIF1 $\alpha$  effects

on cultured NSPCs in the treatment time periods (24 hr) used for these experiments.

**RA Synthesis Is Required for Adult Hippocampal NSPC Proliferation via HIF1 $\alpha$**

Our culture studies point to a key role for RA in stimulation of NSPC proliferation via HIF1 $\alpha$ -VEGFA. Therefore, we tested the feasibility of using systemic manipulation of RA synthesis and HIF1 $\alpha$  to test if RA is required for adult hippocampal NSPC proliferation *in vivo*. *RARE-lacZ* mice were treated with disulfiram (DS), a compound that blocks RA synthesizing enzymes and systemically decreases RA levels, including in the brain (Wagner et al., 2002; Wang et al., 2005; Xu et al., 2017). A 3-day treatment of DS decreased SGZ-located  $\beta$ -gal+/SOX2+ cell number (putative NSPCs) (Figure 3A) but did not alter the number of  $\beta$ -gal+

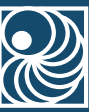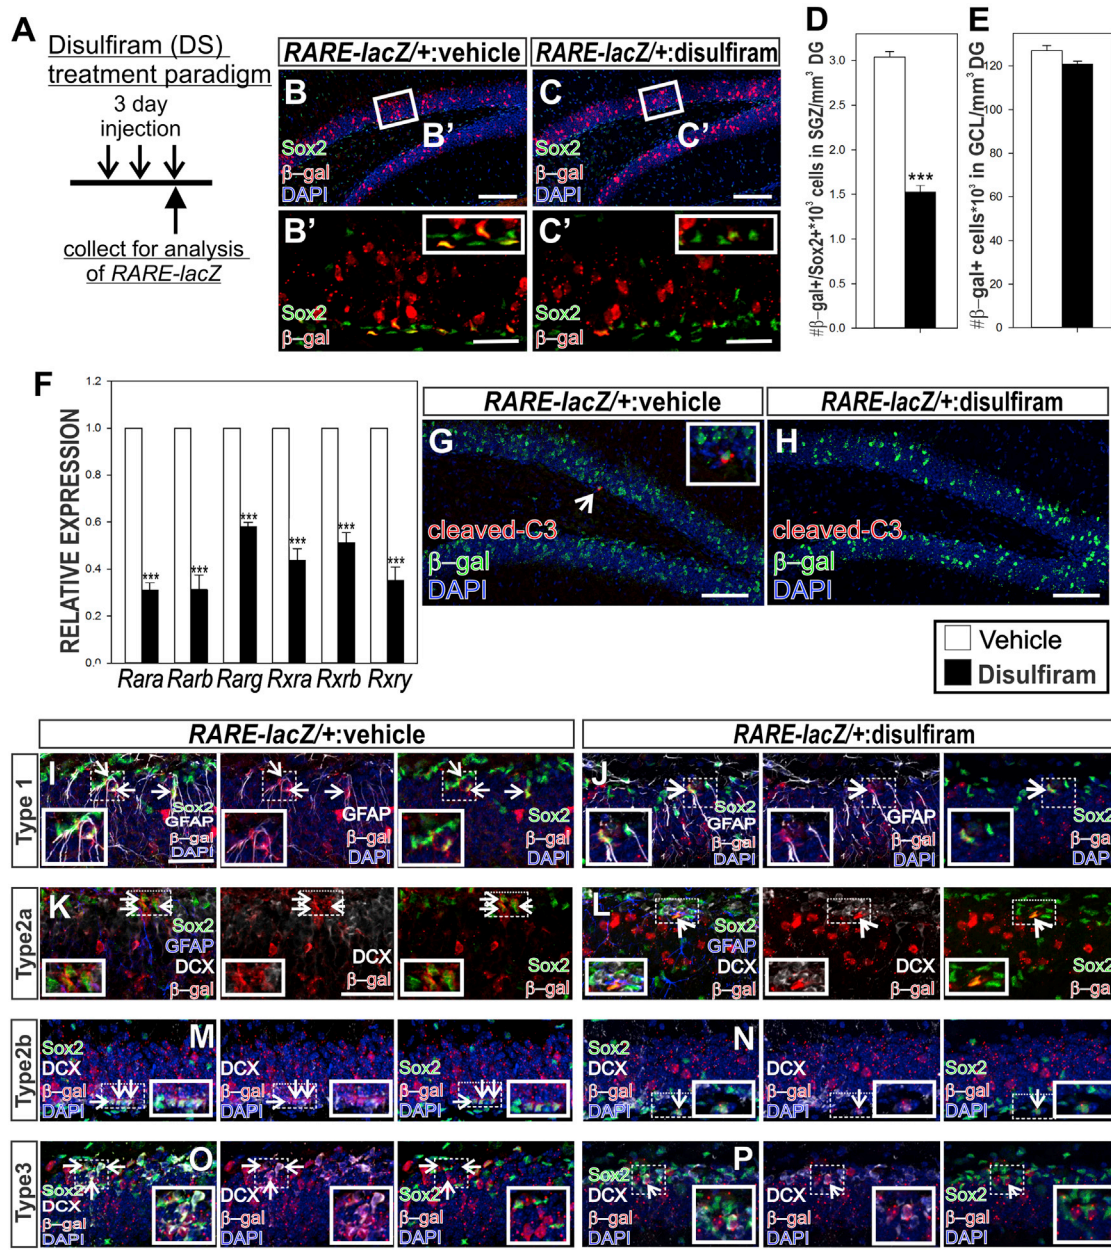

**Figure 3. Systemic Manipulation of RA Synthesis to Test Effects of RA on Adult Hippocampal NSPCs**

(A) Schematic of experimental paradigm.

(B–C'). Confocal images of hippocampi immunolabeled with SOX2 (green), β-gal (red), and DAPI. Scale bars: (B and C) 100 μm, (B' and C') 50 μm.

(D and E) Quantification of β-gal+/SOX2+ cells in the SGZ representing NSPCs with RA signaling (D) and (E) β-gal+ cells in the GCL representing granule neurons.

(F–H) RT-PCR analysis (F) of *Rar* and *Rrx* genes in vehicle and DS-treated mice (G and H) Confocal images of immunolabeling for cleaved caspase-3 (C3; red) and β-gal (green) in *RARE-lacZ* SGZ from vehicle or DS-treated animals. Arrow in (G) indicates C3+/β-gal+ cells. Scale bar, 100 μm.

(I–P) Confocal images from vehicle and DS-treated *RARE-lacZ* mice depicting (I and J) β-gal+ type 1 stem cells (arrows), (K and L) β-gal+ type 2a intermediate progenitor (arrows), (M and N) β-gal+ type 2b intermediate progenitors (arrows), and (O and P) β-gal+ type 3 neuroblasts (arrows). Scale bar, 50 μm.

DS, disulfiram; SGZ, subgranular zone; GCL, granule cell layer. Data represented as mean ± SEM, \*p ≤ 0.05, \*\*p ≤ 0.01, \*\*\*p ≤ 0.001, n = 3.

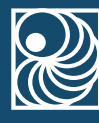

neurons in the GCL (Figures 3B–3E; Table S4). Possibly, the administration of DS for a short period of time affects NSPCs but not neurons or there is a difference in sensitivity between NSPCs and neurons to reduced RA levels. Along these lines, the dose of DS used is predicted to cause a moderate, ~30%, decrease in RA levels in the brain (Xu et al., 2017). Transcript expression of RA receptors (RARs) and retinoid X receptors (RXRs) in whole hippocampus, of which *Rarb* is a direct transcriptional target of RA signaling (de Thé et al., 1990), were significantly decreased with DS (Figure 3F; Table S4). DS treatment did not alter the number of  $\beta$ -gal+ dying cells (identified by cleaved caspase3 labeling) in the SGZ (Figures 3G, and 3H). Using NSPC subtype specific markers, DS-exposed mice showed significantly reduced percentage of (1)  $\beta$ -gal+ stem cells (Figures 3I and 3J, Table S4), (2)  $\beta$ -gal+ type 2a cells (Figures 3K and 3L, Table S4), (3)  $\beta$ -gal+ type 2b cells (Figures 3M and 3N, Table S4), and (4)  $\beta$ -gal+ type 3 cells (Figures 3O and 3P, Table S2). Collectively, these data demonstrate DS treatment reduces NSPC RA signaling, thus validating it as a tool to test the role of RA in NSPC proliferation.

We next tested if systemic DMOG exposure could be used to elevate hippocampal HIF1 $\alpha$  protein expression to test the function of HIF1 $\alpha$  downstream of RA. Vehicle, DS, DS + DMOG, or DMOG injection regimens (Figure 4A) did not alter measured DG volume (Figure 4B; Table S5). DS treatment significantly decreased HIF1 $\alpha$  and VEGFA protein levels (Figures 4C and 4D; Table S5), whereas co-treatment with DMOG significant increased HIF1 $\alpha$  and VEGFA protein level compared with DS alone (Figures 4C and 4D; Table S5). DMOG increased HIF1 $\alpha$  and VEGFA protein levels compared with vehicle (Figures 4C and 4D; Table S5). Taken together with DS and *RARE-lacZ* data, these data show (1) hippocampal HIF1 $\alpha$  and VEGFA expression is dependent on RA synthesis and (2) systemic DS and DMOG exposure is effective to test RA and HIF1 $\alpha$  pathways in adult hippocampal NSPC proliferation.

For our studies of RA-HIF1 $\alpha$  in hippocampal NSPCs proliferation, mice were injected with vehicle, DS, DS + DMOG, or DMOG and the total number of NSPCs was quantified using the same subtype markers used for our *RARE-lacZ* analysis. DS-treated mice showed significantly decreased total number of type 1 stem cells, type 2b, and type 3 progenitors. Compared with DS-treated mice, DS + DMOG-treated mice had significantly higher numbers of each NSPC subtype. Compared with vehicle treatment, DMOG alone significantly increased type 1 stem cells and type 2a cells but not type 2b or type 3 (Figures 4E–4H; Table S5).

Decreased NSPCs numbers could result from either decreased NSPC proliferation or increased cell death. Total number of cleaved caspase3 positive cells was not altered across treatments (Figures S2A–S2E; Table S1), indicating

cell death is not a major factor. To quantify proliferation, mice were injected with EdU (Figure 4A) and EdU+ cells were observed in the SGZ in all treatments (Figure 4I). We quantified percentage EdU+ (%EdU+) NSPCs for each subtype (Figures 4J–4M; Table S5). DS-treated mice showed significantly reduced %EdU+ type 1 stem cells, %EdU+ type 2a, type 2b, and type 3 progenitors. Compared with DS treatment, DS + DMOG-treated mice had significantly higher number of %EdU+ stem cells, %EdU+ type 2a, type 2b, and type 3 progenitors. Compared with vehicle treatment, DMOG alone significantly increased %EdU+ stem cells, type 2a cells, but not type 2b or type 3 cells. Collectively, these data show RA synthesis is required for NSPC proliferation and suggests RA is a positive regulator of adult hippocampal NSPC proliferation via the HIF1 $\alpha$  pathway.

We next tested if impaired NSPC proliferation altered neurogenesis. Using pulse-chase EdU assays (Figures S2F), we found DS decreased the number of newborn neuroblasts, immature neurons, and mature neurons, and restoring HIF1 $\alpha$  protein level with DMOG improved neurogenesis to vehicle levels. DMOG treatment increased neurogenesis relative to vehicle (Figures S2G and S2H; Table S1). An important caveat is DS and DMOG have long half-lives, possibly remaining in the system for 5–7 days post-injection. Altered RA or HIF1 $\alpha$  could affect other stages of adult hippocampal neurogenesis (survival or maturation). Thus the effects on neurogenesis may not be entirely due to altered proliferation but are likely a major contributing factor.

### RA-HIF1 $\alpha$ Signaling Regulates NSPC Proliferation via Regulating S-Phase Re-entry of NSPCs

Diminished NSPC proliferation could result from impaired cell-cycle kinetics, including S-phase re-entry, cell-cycle length, or cell-cycle length exit. To quantify the rate of S-phase re-entry after completing a cell cycle, we utilized a published double thymidine analog approach (Brandt et al., 2012; Farioli-Vecchioli et al., 2014) (Figure 5A). Tbr2 was used to identify intermediate progenitor (IP) cells (type 2a, type 2b) (Hodge et al., 2008; Roybon et al., 2009), and DCX was used to label neuroblasts (NBs; type 3) (Brown et al., 2003). Some Tbr2 positive cells are also DCX positive; however, the percentage is low (Hevner et al., 2006; von Bohlen und Halbach, 2011; Hodge et al., 2012). Different NSPC markers were used to accommodate labeling of two thymidine analogs. We measured percentage S-phase (%S-phase) re-entry for each NSPC subtype (Figure 5A). DS significantly decreased %S-phase re-entry of stem cells. Treatment with DS + DMOG or DMOG significantly increased %S-phase re-entry compared with vehicle and DS-treated mice (Figure 5B; Table S6). Similar analysis with IPs showed a significant decrease in %S-phase re-entry

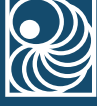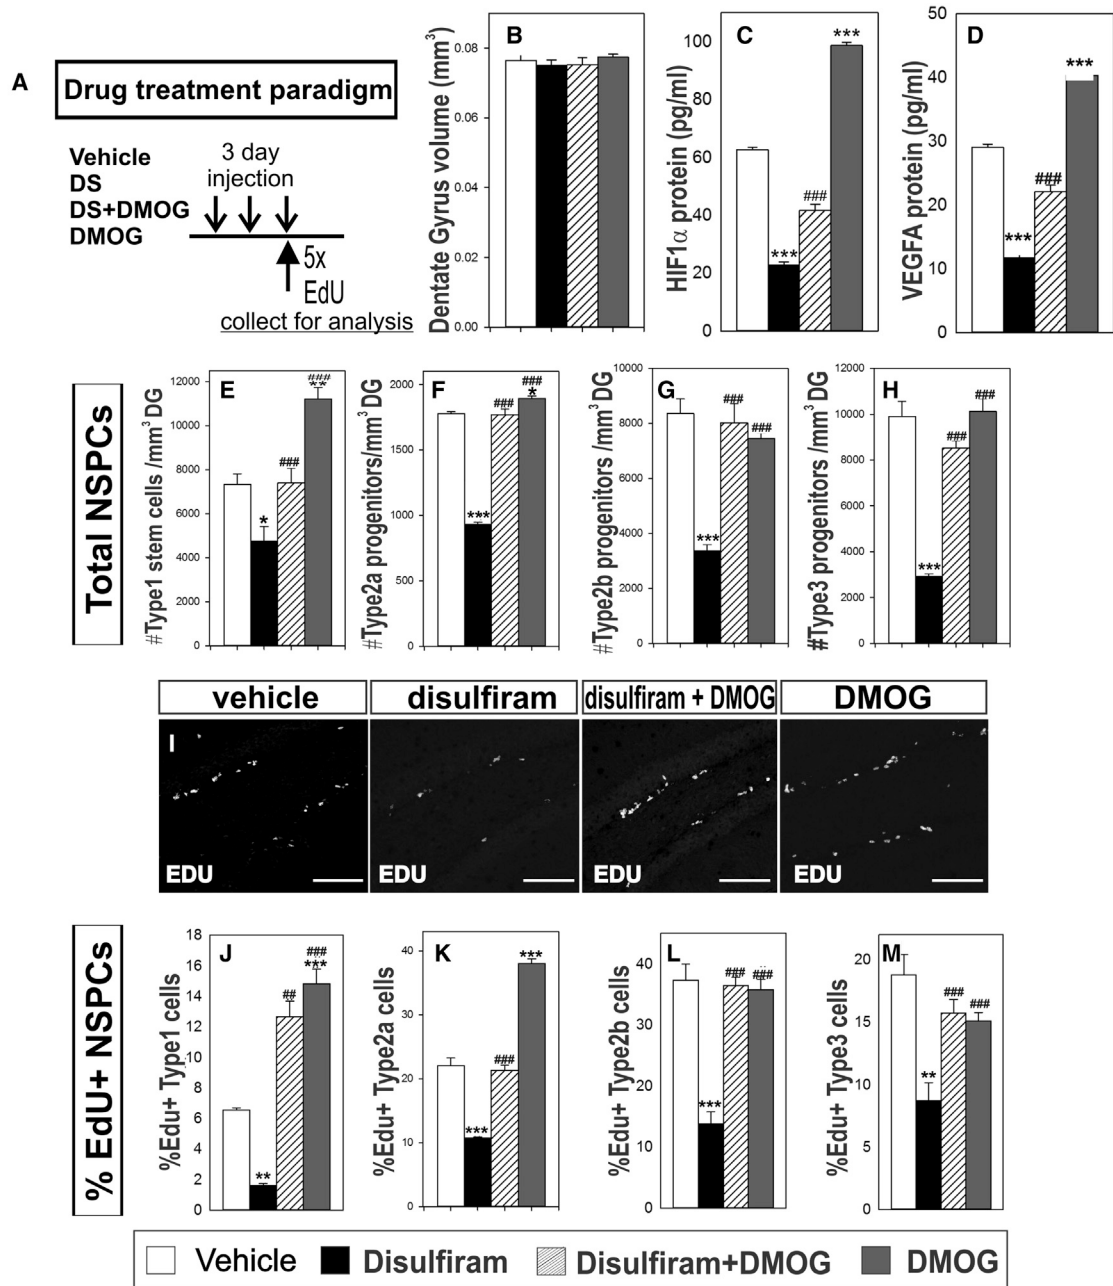

**Figure 4. RA-HIF1A Regulates Adult Hippocampal NSPC Proliferation *In Vivo***

(A) Schematic of experimental paradigm.

(B) Quantification of dentate gyrus (DG) volume in vehicle-, DS-, DS + DMOG-, or DMOG-treated mice.

(C and D) ELISA for HIF1 $\alpha$  and VEGFA protein in hippocampus from vehicle-, DS-, DS + DMOG-, or DMOG-treated mice.

(E-H) Quantification of total number of NSPC subtypes type 1 (E), type 2a (F), type 2b (G) and type 3 (H) across all treatments.

(I) Confocal images showing EdU (white) labeling in the SGZ across all treatments.

(J-M) Quantification of percentage proliferating NSPC subtypes type 1 (J), type 2a (K), type 2b (L) and type 3 (M) in vehicle-, DS-, DS + DMOG-, or DMOG-treated mice.

Scale bar, 100  $\mu$ m. Data represented as mean  $\pm$  SEM, \* $p \leq 0.05$ , \*\* $p \leq 0.01$ , \*\*\* $p \leq 0.001$ , #### $p \leq 0.0001$ ,  $n = 3$ .

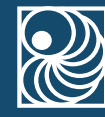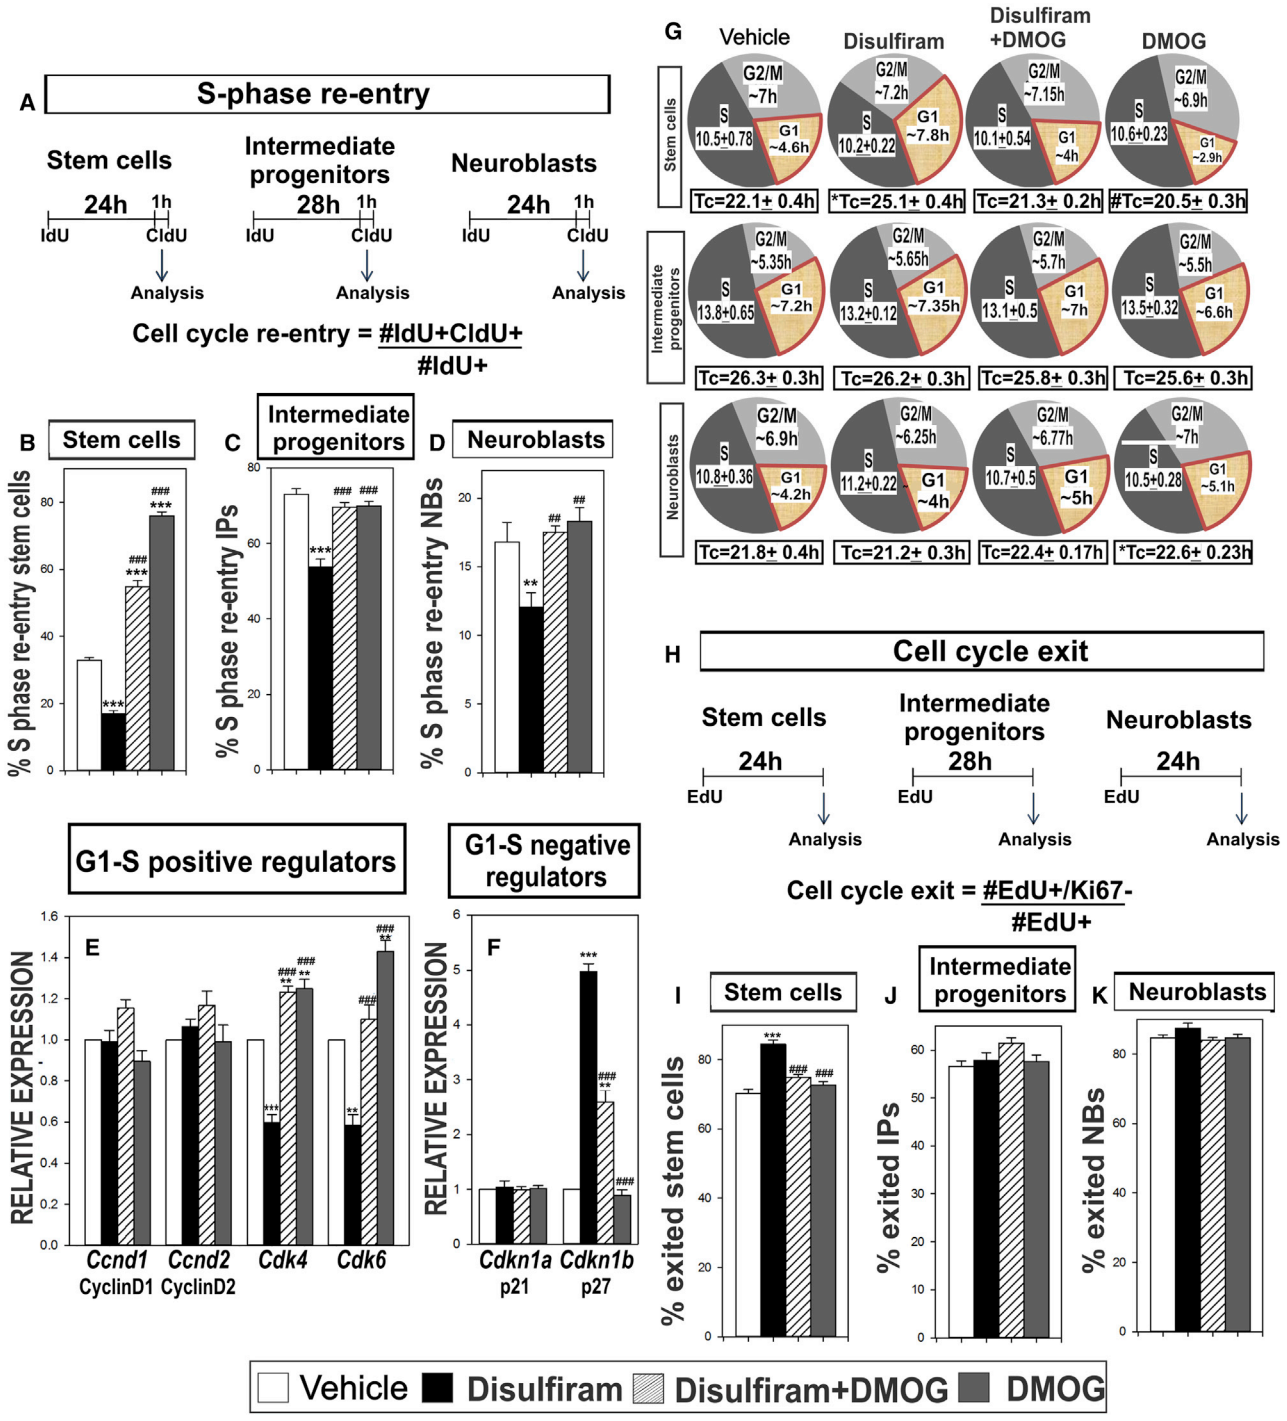

**Figure 5. RA-HIF1A Regulates Adult Hippocampal NSPC Cell-Cycle Kinetics**

(A) Experimental paradigm for calculating %S-phase re-entry.  
 (B–D) Quantification for %S-phase re-entry in (B) stem cells, (C) Tbr2+ intermediate progenitors, and (D) DCX+ neuroblasts.  
 (E and F) RT-PCR gene expression analysis (E) of G1-S positive regulators and (F) G1-S negative regulators.  
 (G) Cell-cycle length analysis using double thymidine analog method in NSPC subtypes.  
 (H) Schema of % cell-cycle exit.  
 (I–K) Quantification of cell-cycle exit in (I) stem cells, (J) intermediate progenitors, and (K) neuroblasts.  
 Data represented as mean ± SEM, \*p ≤ 0.05, \*\*p ≤ 0.01, \*\*\*,###p ≤ 0.001, n = 3.

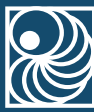

with DS treatment. Though %S-phase re-entry of IPs was significantly increased in DS + DMOG-treated compared with DS-treated mice, DMOG alone did not significantly alter %S-phase re-entry (Figure 5C; Table S6). We observed a similar trend in DCX+ NBs (Figure 5D; Table S6). Taken together, our data indicate RA-HIF1 $\alpha$  signaling is required for S-phase re-entry of NSPCs in the adult hippocampus and points to impaired S-phase re-entry as an underlying cause of decreased NSPC proliferation seen in DS-treated mice.

### RA-HIF1 $\alpha$ Signaling Regulates G1-S Transition of NSPCs

We next tested if decreased S-phase re-entry is due to impaired G1-S transition during cell-cycle progression. We quantified gene expression of G1-S positive regulators Cyclin D1 (Lange et al., 2009; Artegiani et al., 2011), Cyclin D2 (Kowalczyk et al., 2004; Garthe et al., 2014), CDK4 (Lange et al., 2009; Artegiani et al., 2011) and CDK6 (Beukelaers et al., 2011), and G1-S negative regulators p21<sup>Cip1</sup> (Pechnick et al., 2008) and p27<sup>Kip1</sup> (Doetsch et al., 2002; Qiu et al., 2009; Andreu et al., 2015) in whole hippocampus of vehicle-, DS-, DS + DMOG-, and DMOG-treated mice. *Ccnd1* and *Ccnd2* gene expression did not show any difference across treatments. Expression of *Cdk4* and *Cdk6* was significantly decreased in DS-treated mice. DS + DMOG treatment increased *Cdk4* and *Cdk6* gene expression compared with DS-treated mice. DMOG-treated mice showed significantly higher *Cdk4* and *Cdk6* gene expression compared with all treatments (Figure 5E; Table S6). Gene expression of p21<sup>Cip1</sup> was unaltered across treatments (Figure 5F; Table S6). DS treatment significantly increased in p27<sup>Kip1</sup> gene expression. DS + DMOG significantly reduced p27<sup>Kip1</sup> compared with DS-treated mice. DMOG alone did not alter p27<sup>Kip1</sup> relative to vehicle (Figure 5F; Table S6). These data demonstrate impaired RA-HIF1 $\alpha$  signaling alters gene expression of positive and negative regulator of G1-S transition.

We reasoned if there was decreased G1-S transition as suggested by our data thus far, we might observe prolonged G1 length in NSPC subtypes. To test this, we used an established double labeling protocol (Brandt et al., 2012) to measure S-phase length (TS) and total cell-cycle length (TC) of all NSPC types. Using this analysis, we obtained estimates of G1 and G2/M lengths using previously described calculations (Brandt et al., 2012; Fischer et al., 2014). Our analysis identified elongated G1 phase and cell-cycle length of stem cells but not IPs or NBs in DS-treated mice. G1 and cell-cycle length of stem cells significantly decreased in DS + DMOG-treated compared with DS-treated mice. DMOG treatment significantly decreased G1 and cell-cycle length in stem cells compared with vehicle. IPs had no significant difference in G1 or cell-cycle length. However, G1

length and cell-cycle length of NBs was significantly longer in DS + DMOG- and DMOG-treated mice compared with vehicle-treated mice (Figure 5G, Table S6). Collectively, our data point to RA-HIF1 $\alpha$  regulating G1-S transition of NSPCs via control of G1-S cell-cycle regulators. Furthermore, our data indicate stem cells are potentially more responsive to this pathway compared with other NSPC subtypes.

### Impaired RA-HIF1 $\alpha$ Increases Cell-Cycle Exit of Stem Cells

Decreased S-phase re-entry could result from NSPCs increasing cell-cycle exit. To test this, we used an EdU pulse-chase assay then labeled sections with EdU and Ki-67, which identifies all proliferating SGZ cells (Figure 5H). DS treatment significantly increased cell-cycle exit in stem cells. Cell-cycle exit of stem cells in DS + DMOG- and DMOG-treated mice were comparable with vehicle but significantly lower than in DS-treated mice (Figure 5I; Table S6). Cell-cycle exit of IPs (Figure 5J; Table S6) and NBs (Figure 5K; Table S6) was not significantly altered in any treatments. Taken together, our data point to RA-HIF1 $\alpha$  as required for cell-cycle re-entry of stem cells that are already in the cell cycle. Conceivably, impaired G1-S-phase transition increases cell-cycle exit and, presumably, a premature return to quiescence in this population.

### RA Signaling Functions Cell Autonomously in NSPCs to Control Proliferation

DS effects are systemic; therefore, we cannot make firm conclusions about the cell-autonomous function of RA signaling in NSPCs as DS may alter non-NSPC hippocampal cell types. To examine a cell-autonomous role of RA signaling in NSPCs, we utilized tamoxifen-inducible *Nestin-CreERT2* (*Nes-CreERT2*; Lagace et al., 2007) with a conditional, dominant-negative RAR $\alpha$  allele (*dnRAR403-flox*; Rossetot et al., 2010) to disrupt NSPC RA signaling in the adult NSPCs (Figure 6A). *Nestin-CreERT2*<sup>+/-</sup>;*Ai14-fl*/<sup>+</sup> mice were designated as control animals and *Nestin-CreERT2*;*Ai14-fl*/<sup>+</sup>;*dnRAR403fl*/<sup>+</sup> were designated as mutant animals. Recombined NSPCs were identified by tdTomato expression, a red fluorescent protein (RFP) expressed in Cre recombined cells. Disrupted RA signaling in recombined NSPCs reduced the total number of RFP+ cells in the SGZ (Figures 6B–6D; Table S7). This reduction was not due to increased cell death, as shown by no change in RFP+/cleaved caspase-3+ cells (Figures S3A and S3B; Table S1). Additionally, there were no macroscopic changes in hippocampal morphology, as shown by no significant difference in the measured DG volume (Figures S3C). We quantified the percentage of RFP+ cells that co-labeled with the same stem cell, IP, or NB markers used for NSPC cell-cycle analysis. Our data showed a significant decrease



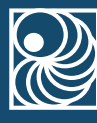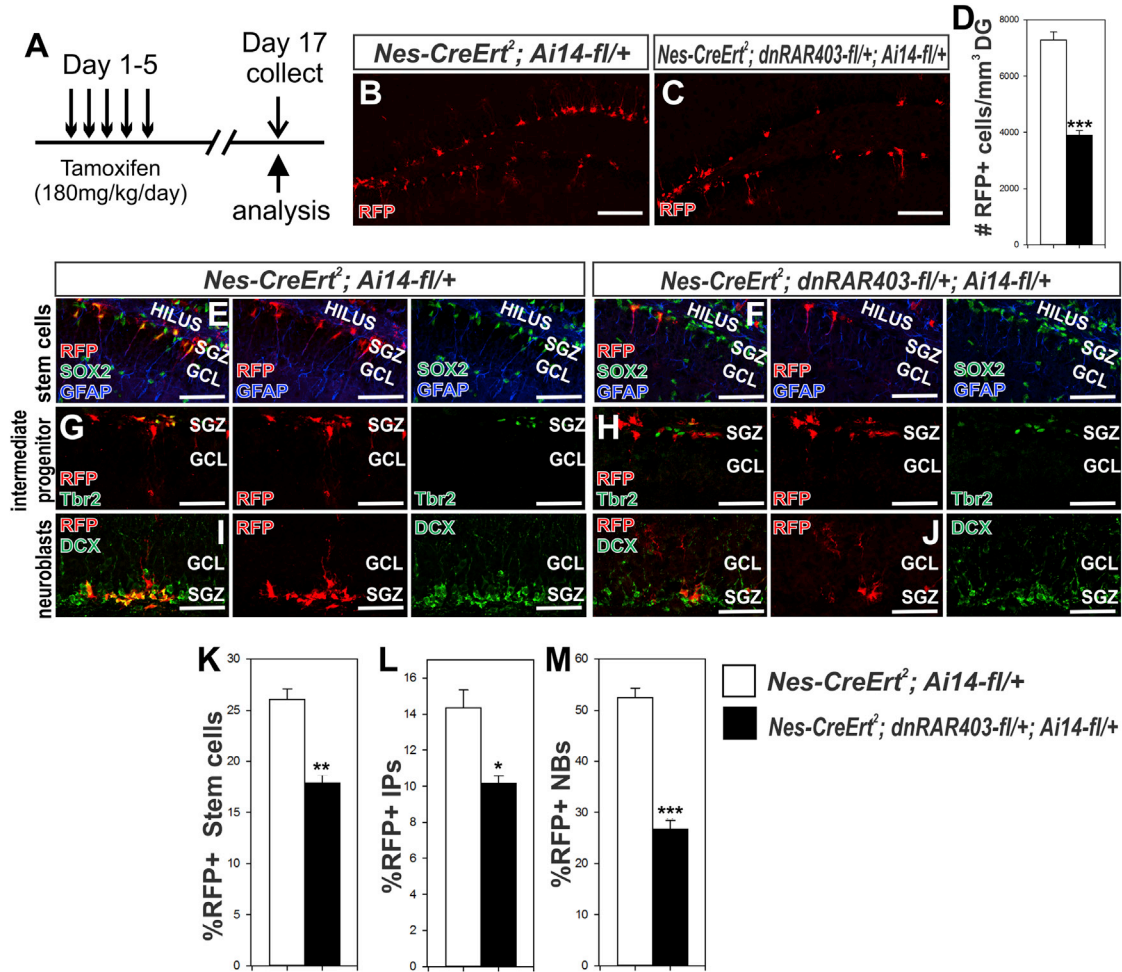

**Figure 6. Disruption of RA Signaling in Adult NSPCs Decreases Their Population**

(A) Paradigm of tamoxifen injection and collection of experimental animals.

(B–D) Representative images depicting RFP+ cells in the (B) control and (C) mutant SGZ. Quantification of RFP+ cells in the DG of each genotype is in (D). Scale bar, 100  $\mu$ m.

(E–M) Fewer RFP+ (E and F) stem cells, intermediate progenitors (G and H), and (I and J) neuroblasts are observed in the mutant SGZ as in compared to control animals. Quantification of RFP+ cells (K) stem cells, (L) intermediate progenitors (IP) and (M) neuroblasts (NB) in the two genotypes. Scale bar, 50  $\mu$ m. Data represented as mean  $\pm$  SEM, \* $p \leq 0.05$ , \*\* $p \leq 0.01$ , \*\*\* $p \leq 0.001$ ,  $n = 3$ .

in percentage of RFP+ (%RFP+) stem cells (Figures 6E, 6F, and 6K; Table S7), IPs (Figures 6G, 6H, and 6L; Table S7), and NBs (Figures 6I, 6J, and 6M; Table S7). This analysis shows that NSPC RA signaling is required for maintaining proper NSPC number. We quantified the percentage of RFP+/EdU+ cells in the SGZ of control and mutant mice. Mutants had significantly lower %RFP+/EdU+ cells in the SGZ compared with controls (Figures 7A–7C; Table S8). We also observed mutants had significantly lower %RFP+/EdU+ stem cells (Figures 7D–7F; Table S8), IPs (Figures 7G–7I; Table S8), and NBs (Figures 7J–7L; Table S8). These data show that disrupting NSPC RA signaling diminishes cell proliferation of all hippocampal NSPCs subtypes.

We next tested if HIF1 $\alpha$  and VEGFA gene expression and protein levels are altered in the hippocampus of mutant animals. We observed a significant reduction in HIF1 $\alpha$  and VEGFA gene (Figures 7M and 7O; Table S8) and protein (Figures 7N and 7P; Table S8) expression in mutants compared with controls. However, we used whole hippocampus; therefore, further studies are required to show that disruption of NSPC RA signaling alters NSPC HIF1 $\alpha$  and VEGFA. We next looked at gene expression of G1-S transition positive and negative regulators in whole hippocampus from control and mutant mice. We did not observe any significant difference in the gene expression of G1-S transition positive regulators (Figure 7Q; Table S8) or

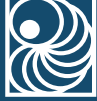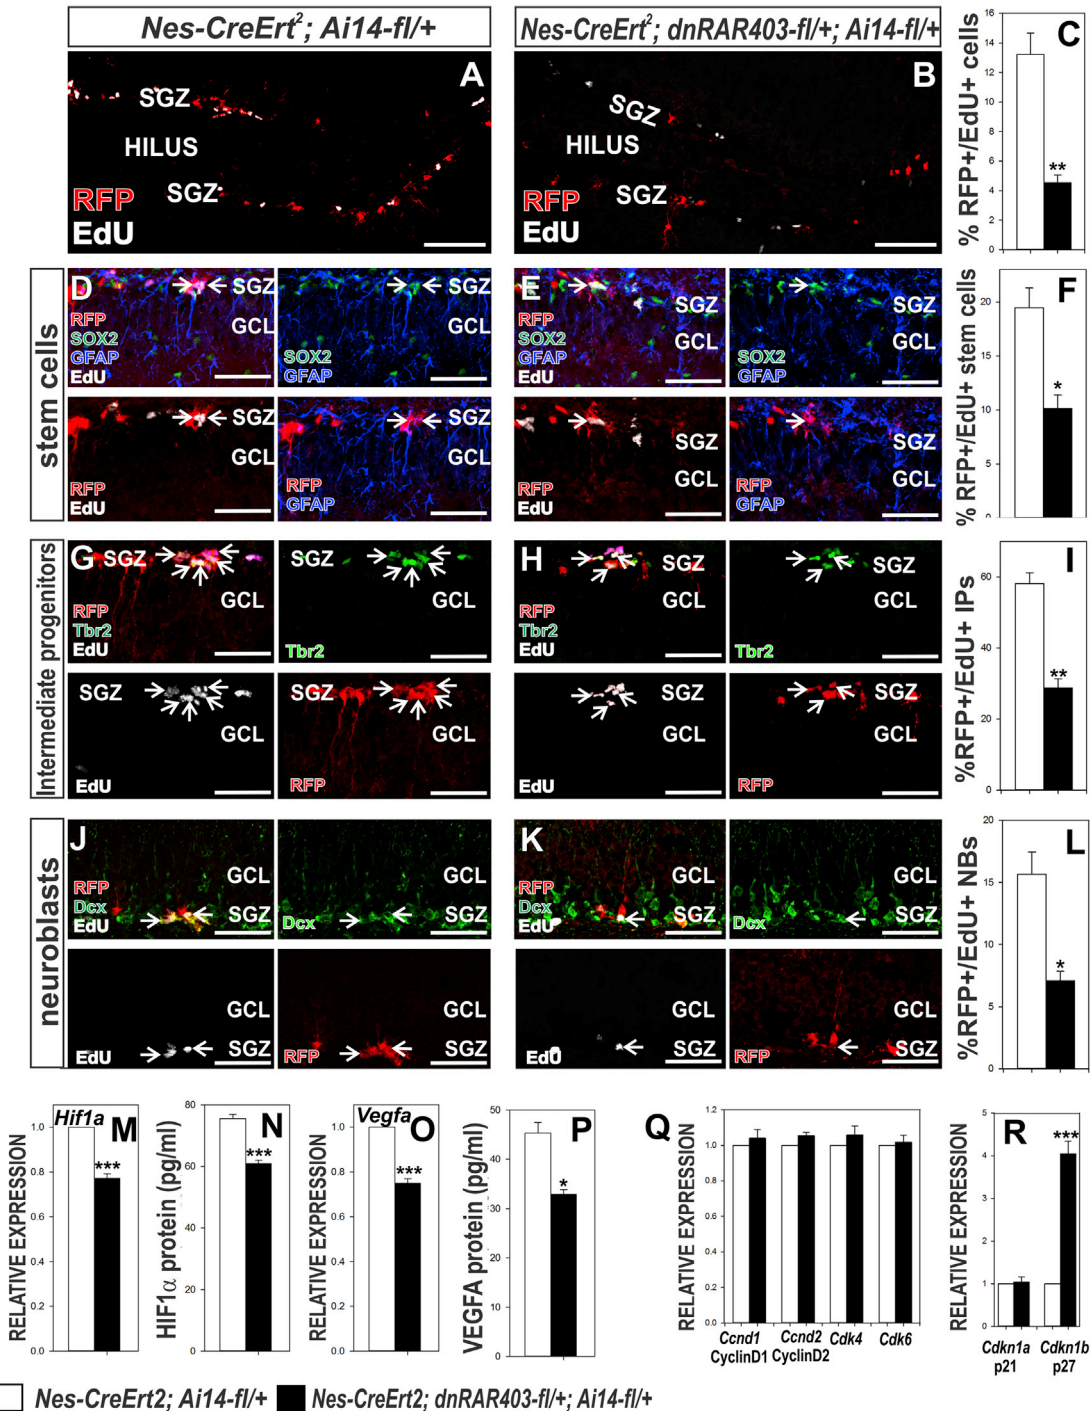

(legend continued on next page)



G1-S negative regulator p21<sup>cip1</sup> (Figure 7R; Table S8). We observed a significant increase in expression of a negative regulator of G1-S transition, p27<sup>kip1</sup> (Figure 7R; Table S8). Taken together, our data suggest that NSPC RA signaling regulates HIF1 $\alpha$ -VEGFA and, possibly, affects NSPCs proliferation by inhibiting p27 expression. Of note, we used RNA isolated from whole hippocampus for gene expression analysis. Cell-cycle regulator gene expression would only be predicted to be affected in a small percentage of cells in the sample. Therefore, detection of gene changes just in recombined NSPCs could be difficult, leaving open the possibility that Cdk4/6 are affected in mice with conditional disruption of NSPC RA signaling.

## DISCUSSION

RA has a vital role in adult hippocampal function and here we describe a previously unknown, cell-autonomous function for RA signaling in adult NSPCs. We find systemic disruption in RA synthesis causes a decrease in NSPC numbers and proliferation. We show impaired NSPC proliferation is due to elongated cell-cycle length, decreased S-phase entry, and increased cell-cycle exit; this was coincident with changes in cell-cycle regulators that would prevent G1-S-phase transition and push cells out of the cell cycle. We identify HIF1 $\alpha$  as a target of RA signaling in adult hippocampal NSPCs and a major mediator of RA's effects on NSPC proliferation. Finally, using conditional disruption of RA signaling in adult NSPCs, we show that RA signaling functions cell autonomously to regulate NSPC proliferation and, potentially, HIF1 $\alpha$  and VEGFA expression. These discoveries are a significant shift from the traditional view that RA primarily promotes neuronal differentiation.

Many studies have looked at RA signaling activity in the hippocampus and its functions in hippocampal neurogenesis and circuitry (reviewed in McCaffery et al., 2006; Shearer et al., 2012). Despite this, no studies have specifically looked for RA signaling in NSPCs, and studies of RA's effects on NSPCs are conflicting. Some studies conclude that RA promotes hippocampal neurogenesis by increasing neuronal differentiation of NSPCs and improving survival of newly born neurons (Crandall et al., 2004; Jacobs et al., 2006; Goodman et al., 2012). If this were its only function, the expectation might be that RA signaling would be limited to type 3 neuroblasts that are the cusp of neuronal differentiation and newborn neu-

rons. However, using NSPC specific markers, we show active RA signaling in type 1 stem cells, type 2a and type 2b IPs, and type 3 neuroblasts. Our studies do not rule out functions for RA in neuronal differentiation and neuronal survival. Instead, they show that RA's effects are much broader than previously appreciated and include roles in promoting NSPC proliferation. Studies using VAD to systemically reduce RA levels have suggested an important role for RA in promoting NSPC proliferation, reporting decreased EdU+ cell number in the hippocampal SGZ in VAD rats (Bonnet et al., 2008). Our work provides a more complete and nuanced picture of RA's effects on NSPC subtype proliferation. For example, though all NSPC subtypes have decreased numbers and EdU incorporation when RA synthesis is blocked, only type 1 stem cells have an elongated G1 phase. Further, our S-phase re-entry analysis shows that proliferating NSPCs are much less likely to re-enter the cell cycle when RA levels are reduced. This observation, along with our data showing decreased expression of G1-to-S-phase regulators and increased expression of cell-cycle inhibitor p27, strongly point to RA promoting proliferation of NSPCs through modulating expression of cell-cycle regulators.

To begin to identify a mechanism of action for RA signaling on NSPC proliferation, we worked from our studies of RA in brain development, where we showed that RA increased VEGFA in neocortical progenitors (Mishra et al., 2016) and follow-up studies identified a parallel increase in protein and transcript of VEGFA regulator, HIF1 $\alpha$ . HIF1 $\alpha$  is a potent transcriptional regulator of VEGFA (Pagès and Pouyssegur, 2005) and RA has been shown to increase HIF1 $\alpha$  (Fernández-Martínez et al., 2011, 2012; Liang et al., 2014). Importantly, HIF1 $\alpha$  is implicated in regulating hippocampal NSPC behavior (Mazumdar et al., 2010). Studies of HIF1 $\alpha$  regulation and activity in adult NSC niches point to niche hypoxia as the main regulator of HIF1 $\alpha$  expression. NSC niches are hypoxic and have increased HIF1 $\alpha$  stabilization (Mazumdar et al., 2010; Roitbak et al., 2011), and hypoxia is sufficient to induce cell proliferation in HIF1 $\alpha$ -dependent cultured SVZ NSPCs (Qi et al., 2017). Our studies identify RA as a hypoxia-independent regulator of HIF1 $\alpha$  in adult hippocampal NSPCs, likely working in parallel with hypoxia in the NSC niche. Most importantly, our rescue experiments using DMOG to restore HIF1 $\alpha$  demonstrate that HIF1 $\alpha$  is likely the primary mediator of RA's effects on NSPC proliferation. Our animal and culture data point to HIF1 $\alpha$  target VEGFA as a key mediator downstream of RA. Hippocampal NSPCs express and

(M–R) Graphs depict quantification of HIF1 $\alpha$  (M) gene (RT-PCR) and (N) protein (ELISA) expression in whole hippocampus of indicated genotypes. VEGFA (O) gene and (P) protein expression in whole hippocampus. Gene expression of (Q) G1-S positive and (R) negative regulators.

Data represented as mean  $\pm$  SEM, \*p  $\leq$  0.05, \*\*p  $\leq$  0.01, \*\*\*p  $\leq$  0.001, n = 3.



release VEGFA, which acts as an NSPC mitogen (Kirby et al., 2015). Conditional deletion of *Vegfa* in adult hippocampal NSPCs results in decreased NSC numbers and proliferation, pointing to a key role of niche produced VEGFA in NSC maintenance (Kirby et al., 2015). WNT- $\beta$ -catenin signaling is implicated downstream of HIF1 $\alpha$  in regulation of stem cell proliferation (Mazumdar et al., 2010). However, studies using embryonic NSPCs point to hypoxia inducing WNT- $\beta$ -catenin activity independent of HIF1 $\alpha$  (Braunschweig et al., 2015), thus further studies are needed to probe this connection.

Systemic manipulation of RA synthesis or HIF1 $\alpha$  stabilization has the potential to affect all cells in the hippocampus. We show RA has a stimulatory effect on HIF1 $\alpha$  and VEGFA expression in hippocampal neurons differentiated from NSPCs but not astrocytes. However, it is unclear if hippocampal neurons are a significant source of VEGFA for the niche, regulated by RA or other signals, since *VEGFA-GFP* reporter studies did not detect reporter activity in hippocampal granule cells (Kirby et al., 2015). The dose of DS used appears to only partially reduce RA synthesis and, thus, RA levels in the hippocampus such that only the NSPCs showed a decrease in RA signaling, whereas the number of granule cells with RA signaling was unchanged. However, *RARE-lacZ* activity is only one measure of RA signaling and neuronal RA signaling could still be impaired in hippocampal granule cells by DS. This is important as RA has important functions in granule cell synapse plasticity and hippocampal circuitry (Aoto et al., 2008; Maghsoodi et al., 2008; Jiang et al., 2012), and neuronal activity is a major stimulant of NSPC proliferation (reviewed in Pineda and Encinas, 2016). Also important to consider is effects on the vascular niche. HIF1 $\alpha$  and VEGFA, impaired by DS treatment, regulate blood vessels in NSC niches (Roitbak et al., 2008; Li et al., 2014; Licht et al., 2016). The strongest support we have for RA acting directly on NSPCs is our data (1) showing RA signaling in NSPC subtypes and (2) showing conditional disruption of RA signaling in adult NSPCs decreases proliferation and HIF1 $\alpha$  and VEGFA expression. Demonstrating a cell-autonomous effect of RA in hippocampal NSPCs is important for future studies understanding the mechanism of RA's effect on proliferation. However, it is equally important to understand the impact of systemic decreases in RA or RA signaling on the whole hippocampus and how this could affect neurogenesis. This is especially valuable information for evaluating RA therapeutics used to treat cancer (Chakrabarti et al., 2016) or in clinical trials for neurological disorders like Alzheimer disease (Shudo et al., 2009; Fukasawa et al., 2012; Chakrabarti et al., 2016) and to better elucidate the impact of chronic deficiency of vitamin A on the brains of millions of people worldwide

(Shearer et al., 2012; Stoney and McCaffery, 2016; Wirth et al., 2017).

## EXPERIMENTAL PROCEDURES

### Animals

Mice were housed in specific-pathogen-free facilities approved by Assessment and Accreditation of Laboratory Animal Care and were handled in accordance with protocols approved by the Institutional Animal Care and Use Committee. Mice were housed under a 12 hr light/dark cycle and were given food and water *ad libitum*. All mouse strains used in this study and chemicals administered via intraperitoneal injections are listed in Table S1.

### Tissue Collection and Processing

Mice were anesthetized with sodium pentobarbital (40 mg/kg) and perfused with 0.1 M PBS followed by 4% paraformaldehyde (PFA). Brains were harvested and postfixed overnight in 4% PFA at 4°C and then cryoprotected with 20% sucrose in PBS at 4°C. Brains were frozen in optimal cutting temperature compound and 40  $\mu$ m cryosections were obtained for all experiments.

### Immunohistochemistry

Brain sections were subjected to heat mediated antigen retrieval using citric acid (pH 6) for 15 min and blocked with 10% lamb serum for 1 hr at room temperature. Sections were incubated overnight at 4°C with primary antibodies listed in Table S1. Sections were washed in PBS and incubated with species-appropriate fluorophore conjugated secondary antibodies (AlexaFluor, Invitrogen 1:500) for 2 hr at room temperature before mounting. For some experiments, sections were counterstained with DAPI (1  $\mu$ g/mL).

### In Vivo Cell Proliferation Analysis

For cell proliferation analysis, mice were injected with EdU (150 mg/kg) five times every 2 hr over 10 hr on the day of collection as previously described (Morshead et al., 1998). Brain sections were immunostained with a combination of markers to identify NSCs and progenitor cells. Click-iT 647 Imaging Kit (#C10340, Thermo Fisher Scientific) was used to detect EdU. Percentage of proliferating cells was determined as total EdU+ stem or progenitor cells divided by the total stem or progenitor cell population. Description of cell-cycle analysis is provided in Supplemental Information.

### Imaging and Stereological Analysis

Brain sections were imaged using confocal microscopy using a Zeiss 780 laser scanning microscope. Single-plane confocal images and Z stacks were obtained to image cells immunostained with combination of markers. Cells labeled with marker(s) to identify NSPCs and various thymidine analogs were counted throughout the rostro-caudal extent of DG using one in every six series of 40  $\mu$ m coronal sections as previously described (Lagace et al., 2007, 2010). The total number of cells in all experimental groups was normalized to volume of DG analyzed. Volume of DG was calculated as previously described (Lagace et al., 2007, 2010). Briefly, area was calculated by tracing the outline of each blade of

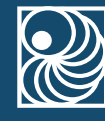

DG in each section. Subsequently, areas of all the sections were added and multiplied with section thickness (40  $\mu\text{m}$ ) and inverse of sampling fraction (six) to obtain DG volume analyzed. We analyzed three animals ( $n = 3$ ) per treatment condition or genotype for all imaging based analysis.

### Hippocampal NSC Cultures and Cell Proliferation Assay

Adult rat hippocampal NSCs (#SCR022, Millipore) were seeded onto poly-L-ornithine and laminin coated 24-well plates as a monolayer culture. Cells were cultured in NSC expansion medium (#SCM009, Millipore) containing DMEM/F12; B27 supplement; 2 mM L-glutamine; and 1 $\times$  penicillin, streptomycin, and fungizone. Culture medium was supplemented with basic fibroblast growth factor (20 ng/mL) to maintain cells in the undifferentiated state. All chemicals and their concentrations used in cell culture experiments are listed in Table S1. Following 24 hr treatment, NSCs were incubated with 10  $\mu\text{M}$  EdU for 3 hr. Cells were fixed with 4% PFA, washed with 1 $\times$  PBS, and permeabilized with 0.5% Triton X-100. EdU incorporation was detected according to manufacturer's instructions (Click-iT EdU Alexa Fluor 647 kit). Post-EdU detection, cells were incubated overnight with anti-SOX2 and nuclei were labeled with DAPI. LI was calculated as EdU+/SOX2+/total SOX2+ cells. All measurements were performed using ImageJ software on a minimum of ten 20 $\times$ fields per coverslip. Three independent experiments ( $n = 3$ ) were analyzed for all treatments.

### Statistical Analysis

To detect statistically significant differences in mean values between two groups, Student's t test was used. For analysis that compared more than two groups, a one-way ANOVA with Tukey's post hoc analysis was used to detect statistically significant differences between treatment conditions using pairwise analysis. The SEM is reported on all graphs. Results from all experiments are provided in Tables S1, S2, S3, S4, S5, S6, S7, and S8.

### SUPPLEMENTAL INFORMATION

Supplemental Information includes Supplemental Experimental Procedures, three figures, and eight tables and can be found with this article online at <https://doi.org/10.1016/j.stemcr.2018.04.024>.

### AUTHOR CONTRIBUTIONS

S.M. and J.A.S. conceived the study. S.M., K.K.K., and N.L.M. performed experiments. S.M. and J.A.S. prepared the figures and wrote the manuscript.

### ACKNOWLEDGMENTS

This work was supported by the Children's Hospital of Colorado Research Foundation (start-up funds to J.A.S.) and the NIH/National Institute of Neurological Disorders and Stroke (R01 NS098273 to J.A.S.). The senior author would like to acknowledge the contributions of Marie Siegenthaler and dedicate this work to her memory.

Received: December 11, 2017

Revised: April 26, 2018

Accepted: April 26, 2018

Published: May 24, 2018

### SUPPORTING CITATIONS

The following reference appears in the Supplemental Information: Brandt et al., 2014.

### REFERENCES

- Amati, F., Diano, L., Campagnolo, L., Vecchione, L., Cipollone, D., Bueno, S., Prosperini, G., Desideri, A., Siracusa, G., and Chillemi, G. (2010). Hif1 $\alpha$  down-regulation is associated with transposition of great arteries in mice treated with a retinoic acid antagonist. *BMC Genomics* 11, 497.
- Andreu, Z., Khan, M.A., González-Gómez, P., Negueruela, S., Horigüela, R., San Emeterio, J., Ferrón, S.R., Martínez, G., Vidal, A., Fariñas, I., et al. (2015). The cyclin-dependent kinase inhibitor p27kip1 regulates radial stem cell quiescence and neurogenesis in the adult hippocampus. *Stem Cells* 33, 219–229.
- Antequera, D., Portero, A., Bolos, M., Orive, G., Hernández, R.M., Pedraz, J.L., and Carro, E. (2012). Encapsulated VEGF-secreting cells enhance proliferation of neuronal progenitors in the hippocampus of A $\beta$ PP/Ps1 mice. *J. Alzheimers Dis.* 29, 187–200.
- Aoto, J., Nam, C.I., Poon, M.M., Ting, P., and Chen, L. (2008). Synaptic signaling by all-trans retinoic acid in homeostatic synaptic plasticity. *Neuron* 60, 308–320.
- Artegiani, B., Lindemann, D., and Calegari, F. (2011). Overexpression of Cdk4 and CyclinD1 triggers greater expansion of neural stem cells in the adult mouse brain. *J. Exp. Med.* 208, 937–948.
- Ashton, R.S., Conway, A., Pangarkar, C., Bergen, J., Lim, K.-I., Shah, P., Bissell, M., and Schaffer, D.V. (2012). Astrocytes regulate adult hippocampal neurogenesis through ephrin-B signaling. *Nat. Neurosci.* 15, 1399–1406.
- Beukelaers, P., Vandenbosch, R., Caron, N., Nguyen, L., Belachew, S., Moonen, G., Kiyokawa, H., Barbacid, M., Santamaria, D., and Malgrange, B. (2011). Cdk6-dependent regulation of G(1) length controls adult neurogenesis. *Stem Cells* 29, 713–724.
- Bonaguidi, M.A., Wheeler, M.A., Shapiro, J.S., Stadel, R.P., Sun, G.J., and Ming, G.L. (2011). In vivo clonal analysis reveals self-renewing and multipotent adult neural stem cell characteristics. *Cell* 145, 1142–1155.
- Bonnet, E., Touyarot, K., Alfoss, S., Pallet, V., Higuieret, P., and Abrous, D.N. (2008). Retinoic acid restores adult hippocampal neurogenesis and reverses spatial memory deficit in vitamin A deprived rats. *PLoS One* 3, e3487.
- Brandt, M.D., Hübner, M., and Storch, A. (2012). Brief report: adult hippocampal precursor cells shorten S-phase and total cell cycle length during neuronal differentiation. *Stem Cells* 30, 2843–2847.
- Brandt, M.D., Ellwardt, E., and Storch, A. (2014). Short- and long-term treatment with modafinil differentially affects adult hippocampal neurogenesis. *Neuroscience* 278, 267–275.

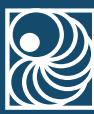

- Braunschweig, L., Meyer, A.K., Wagenführ, L., and Storch, A. (2015). Oxygen regulates proliferation of neural stem cells through Wnt/ $\beta$ -catenin signalling. *Mol. Cell. Neurosci.* 67, 84–92.
- Brown, J.P., Couillard-Despres, S., Cooper-Kuhn, C.M., Winkler, J., Aigner, L., and Kuhn, H.G. (2003). Transient expression of doublecortin during adult neurogenesis. *J. Comp. Neurol.* 467, 1–10.
- Chakrabarti, M., McDonald, A.J., Will Reed, J., Moss, M.A., Das, B.C., and Ray, S.K. (2016). Molecular signaling mechanisms of natural and synthetic retinoids for inhibition of pathogenesis in Alzheimer's disease. *J. Alzheimers Dis.* 50, 335–352.
- Chatzi, C., Schnell, E., and Westbrook, G.L. (2015). Localized hypoxia within the subgranular zone determines the early survival of newborn hippocampal granule cells. *eLife* 4, e08722.
- Crandall, J., Sakai, Y., Zhang, J., Koul, O., Mineur, Y., Crusio, W.E., and McCaffery, P. (2004). 13-cis-retinoic acid suppresses hippocampal cell division and hippocampal-dependent learning in mice. *Proc. Natl. Acad. Sci. USA* 101, 5111–5116.
- Crews, L., Adame, A., Patrick, C., Delaney, A., Pham, E., Rockenstein, E., Hansen, L., and Masliah, E. (2010). Increased BMP6 levels in the brains of Alzheimer's disease patients and APP transgenic mice are accompanied by impaired neurogenesis. *J. Neurosci.* 30, 12252–12262.
- de Thé, H., Vivanco-Ruiz, M.M., Tiollais, P., Stunnenberg, H., and Dejean, A. (1990). Identification of a retinoic acid responsive element in the retinoic acid receptor beta gene. *Nature* 343, 177–180.
- Deng, W., Saxe, M.D., Gallina, I.S., and Gage, F.H. (2009). Adult-born hippocampal dentate granule cells undergoing maturation modulate learning and memory in the brain. *J. Neurosci.* 29, 13532–13542.
- Doetsch, F., Verdugo, J.M.-G., Caille, I., Alvarez-Buylla, A., Chao, M.V., and Casaccia-Bonnel, P. (2002). Lack of the cell-cycle inhibitor p27Kip1 results in selective increase of transit-amplifying cells for adult neurogenesis. *J. Neurosci.* 22, 2255–2264.
- Farioli-Vecchioli, S., Mattera, A., Micheli, L., Ceccarelli, M., Leonardini, L., Saraulli, D., Costanzi, M., Cestari, V., Rouault, J.-P., and Tirone, F. (2014). Running rescues defective adult neurogenesis by shortening the length of the cell cycle of neural stem and progenitor cells. *Stem Cells* 32, 1968–1982.
- Fernández-Martínez, A.B., Jiménez, M.I.A., and Cazaña, F.J.L. (2012). Retinoic acid increases hypoxia-inducible factor-1 $\alpha$  through intracrine prostaglandin E 2 signaling in human renal proximal tubular cells HK-2. *Biochim. Biophys. Acta* 1821, 672–683.
- Fernández-Martínez, A.B., Jiménez, M.I.A., Hernández, I.S., García-Bermejo, M.L., Manzano, V.M., Fraile, E.A., and de Lucio-Cazaña, F.J. (2011). Mutual regulation of hypoxic and retinoic acid related signaling in tubular proximal cells. *Int. J. Biochem. Cell Biol.* 43, 1198–1207.
- Ferri, A.L., Cavallaro, M., Braidà, D., Di Cristofano, A., Canta, A., Vezzani, A., Ottolenghi, S., Pandolfi, P.P., Sala, M., DeBiasi, S., and Nicolis, S.K. (2004). SOX2 deficiency causes neurodegeneration and impaired neurogenesis in the adult mouse brain. *Development* 131, 3805–3819.
- Fischer, T.J., Walker, T.L., Overall, R.W., Brandt, M.D., and Kempermann, G. (2014). Acute effects of wheel running on adult hippocampal precursor cells in mice are not caused by changes in cell cycle length or S phase length. *Front. Neurosci.* 8, 314.
- Fournier, N.M., Lee, B., Banasr, M., Elsayed, M., and Duman, R.S. (2012). Vascular endothelial growth factor regulates adult hippocampal cell proliferation through MEK/ERK- and PI3K/Akt-dependent signaling. *Neuropharmacology* 63, 642–652.
- Fukasawa, H., Nakagomi, M., Yamagata, N., Katsuki, H., Kawahara, K., Kitaoka, K., Miki, T., and Shudo, K. (2012). Tamibarotene: a candidate retinoid drug for Alzheimer's disease. *Biol. Pharm. Bull.* 35, 1206–1212.
- Gage, F., Kempermann, G., Palmer, T., Peterson, D., and Ray, J. (1998). Multipotent progenitor cells in the adult dentate gyrus. *J. Neurobiol.* 36, 249–266.
- Garthe, A., Huang, Z., Kaczmarek, L., Filipkowski, R., and Kempermann, G. (2014). Not all water mazes are created equal: cyclin D2 knockout mice with constitutively suppressed adult hippocampal neurogenesis do show specific spatial learning deficits. *Genes Brain Behav.* 13, 357–364.
- Gomez-Nicola, D., Suzzi, S., Vargas-Caballero, M., Fransén, N.L., Al-Malki, H., Cebrian-Silla, A., Garcia-Verdugo, J.M., Riecken, K., Fehse, B., and Perry, V.H. (2014). Temporal dynamics of hippocampal neurogenesis in chronic neurodegeneration. *Brain* 137, 2312–2328.
- Gonda, D.K., Bachmair, A., Wüning, I., Tobias, J.W., Lane, W.S., and Varshavsky, A. (1989). Universality and structure of the N-end rule. *J. Biol. Chem.* 264, 16700–16712.
- Goodman, T., Crandall, J.E., Nanesco, S.E., Quadro, L., Shearer, K., Ross, A., and McCaffery, P. (2012). Patterning of retinoic acid signaling and cell proliferation in the hippocampus. *Hippocampus* 22, 2171–2183.
- Hevner, R.F., Hodge, R.D., Daza, R.A.M., and Englund, C. (2006). Transcription factors in glutamatergic neurogenesis: conserved programs in neocortex, cerebellum, and adult hippocampus. *Neurosci. Res.* 55, 223–233.
- Hodge, R.D., Nelson, B.R., Kahoud, R.J., Yang, R., Mussar, K.E., Reiner, S.L., and Hevner, R.F. (2012). Tbr2 is essential for hippocampal lineage progression from neural stem cells to intermediate progenitors and neurons. *J. Neurosci.* 32, 6275–6287.
- Hodge, R.D., Kowalczyk, T.D., Wolf, S.A., Encinas, J.M., Rippey, C., Enikolopov, G., Kempermann, G., and Hevner, R.F. (2008). Intermediate progenitors in adult hippocampal neurogenesis: Tbr2 expression and coordinate regulation of neuronal output. *J. Neurosci.* 28, 3707–3717.
- Höglinger, G.U., Rizk, P., Muriel, M.P., Duyckaerts, C., Oertel, W.H., Caille, I., and Hirsch, E.C. (2004). Dopamine depletion impairs precursor cell proliferation in Parkinson disease. *Nat. Neurosci.* 7, 726–735.
- Jacobs, S., Lie, D.C., DeCicco, K.L., Shi, Y., DeLuca, L.M., Gage, F.H., and Evans, R.M. (2006). Retinoic acid is required early during adult neurogenesis in the dentate gyrus. *Proc. Natl. Acad. Sci. USA* 103, 3902–3907.
- Jiang, W., Yu, Q., Gong, M., Chen, L., Wen, E.Y., Bi, Y., Zhang, Y., Shi, Y., Qu, P., Liu, Y.X., et al. (2012). Vitamin A deficiency impairs

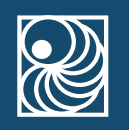

postnatal cognitive function via inhibition of neuronal calcium excitability in hippocampus. *J. Neurochem.* *121*, 932–943.

Jin, K., Zhu, Y., Sun, Y., Mao, X.O., Xie, L., and Greenberg, D.A. (2002). Vascular endothelial growth factor (VEGF) stimulates neurogenesis in vitro and in vivo. *Proc. Natl. Acad. Sci. USA* *99*, 11946–11950.

Kempermann, G., Jessberger, S., Steiner, B., and Kronenberg, G. (2004). Milestones of neuronal development in the adult hippocampus. *Trends Neurosci.* *27*, 447–452.

Kirby, E.D., Kuwahara, A.A., Messer, R.L., and Wyss-Coray, T. (2015). Adult hippocampal neural stem and progenitor cells regulate the neurogenic niche by secreting VEGF. *Proc. Natl. Acad. Sci. USA* *112*, 4128–4133.

Komitova, M., and Eriksson, P.S. (2004). Sox-2 is expressed by neural progenitors and astroglia in the adult rat brain. *Neurosci. Lett.* *369*, 24–27.

Kong, D., Park, E.J., Stephen, A.G., Calvani, M., Cardellina, J.H., Monks, A., Fisher, R.J., Shoemaker, R.H., and Melillo, G. (2005). Echinomycin, a small-molecule inhibitor of hypoxia-inducible factor-1 DNA-binding activity. *Cancer Res.* *65*, 9047–9055.

Kowalczyk, A., Filipkowski, R.K., Rylski, M., Wilczynski, G.M., Kopacki, F.A., Jaworski, J., Ciemerych, M.A., Sicinski, P., and Kaczmarek, L. (2004). The critical role of cyclin D2 in adult neurogenesis. *J. Cell Biol.* *167*, 209–213.

Lagace, D.C., Donovan, M.H., DeCarolis, N.A., Farnbauch, L.A., Malhotra, S., Berton, O., Nestler, E.J., Krishnan, V., and Eisch, A.J. (2010). Adult hippocampal neurogenesis is functionally important for stress-induced social avoidance. *Proc. Natl. Acad. Sci. USA* *107*, 4436–4441.

Lagace, D.C., Whitman, M.C., Noonan, M.A., Ables, J.L., DeCarolis, N.A., Arguello, A.A., Donovan, M.H., Fischer, S.J., Farnbauch, L.A., Beech, R.D., et al. (2007). Dynamic contribution of nestin-expressing stem cells to adult neurogenesis. *J. Neurosci.* *27*, 12623–12629.

Lange, C., Huttner, W.B., and Calegari, F. (2009). Cdk4/CyclinD1 overexpression in neural stem cells shortens G1, delays neurogenesis, and promotes the generation and expansion of basal progenitors. *Cell Stem Cell* *5*, 320–331.

Li, L., Candelario, K.M., Thomas, K., Wang, R., Wright, K., Messier, A., and Cunningham, L.A. (2014). Hypoxia inducible factor-1 $\alpha$  (HIF-1 $\alpha$ ) is required for neural stem cell maintenance and vascular stability in the adult mouse SVZ. *J. Neurosci.* *34*, 16713–16719.

Liang, C., Guo, S., and Yang, L. (2014). Effects of all-trans retinoic acid on VEGF and HIF-1 $\alpha$  expression in glioma cells under normoxia and hypoxia and its anti-angiogenic effect in an intracerebral glioma model. *Mol. Med. Rep.* *10*, 2713–2719.

Licht, T., Rothe, G., Kreisel, T., Wolf, B., Benny, O., Rooney, A.G., French-Constant, C., Enikolopov, G., and Keshet, E. (2016). VEGF preconditioning leads to stem cell remodeling and attenuates age-related decay of adult hippocampal neurogenesis. *Proc. Natl. Acad. Sci. USA* *113*, E7828–E7836.

Lugert, S., Basak, O., Knuckles, P., Haussler, U., Fabel, K., Götz, M., Haas, C.A., Kempermann, G., Taylor, V., and Giachino, C. (2010). Quiescent and active hippocampal neural stem cells with distinct

morphologies respond selectively to physiological and pathological stimuli and aging. *Cell Stem Cell* *6*, 445–456.

Maden, M. (2007). Retinoic acid in the development, regeneration and maintenance of the nervous system. *Nat. Rev. Neurosci.* *8*, 755–765.

Maghsoodi, B., Poon, M.M., Nam, C.I., Aoto, J., Ting, P., and Chen, L. (2008). Retinoic acid regulates RAR $\alpha$ -mediated control of translation in dendritic RNA granules during homeostatic synaptic plasticity. *Proc. Natl. Acad. Sci. USA* *105*, 16015–16020.

Mazumdar, J., O'Brien, W.T., Johnson, R.S., LaManna, J.C., Chavez, J.C., Klein, P.S., and Simon, M.C. (2010). O<sub>2</sub> regulates stem cells through Wnt/ $\beta$ -catenin signalling. *Nat. Cell Biol.* *12*, 1007–1013.

McCaffery, P., Zhang, J., and Crandall, J.E. (2006). Retinoic acid signaling and function in the adult hippocampus. *J. Neurobiol.* *66*, 780–791.

McCutcheon, S.C., Jones, K., Cumming, S.A., Kemp, R., Ireland-Zecchini, H., Saunders, J.C., Houghton, C.A., Howard, L.A., and Winton, D.J. (2010). Characterization of a heat resistant  $\beta$ -glucosidase as a new reporter in cells and mice. *BMC Biol.* *8*, 89.

Mishra, S., Choe, Y., Pleasure, S.J., and Siegenthaler, J.A. (2016). Cerebrovascular defects in Foxc1 mutants correlate with aberrant WNT and VEGF-A pathways downstream of retinoic acid from the meninges. *Dev. Biol.* *420*, 148–165.

Misner, D.L., Jacobs, S., Shimizu, Y., de Urquiza, A.M., Solomin, L., Perlmann, T., De Luca, L.M., Stevens, C.F., and Evans, R.M. (2001). Vitamin A deprivation results in reversible loss of hippocampal long-term synaptic plasticity. *Proc. Natl. Acad. Sci. USA* *98*, 11714–11719.

Morshead, C.M., Craig, C.G., and van der Kooy, D. (1998). In vivo clonal analyses reveal the properties of endogenous neural stem cell proliferation in the adult mammalian forebrain. *Development* *125*, 2251–2261.

Pagès, G., and Pouyssegur, J. (2005). Transcriptional regulation of the Vascular Endothelial Growth Factor gene—a concert of activating factors. *Cardiovasc. Res.* *65*, 564–573.

Pechnick, R.N., Zonis, S., Wawrowsky, K., Pourmorady, J., and Chesnokova, V. (2008). p21Cip1 restricts neuronal proliferation in the subgranular zone of the dentate gyrus of the hippocampus. *Proc. Natl. Acad. Sci. USA* *105*, 1358–1363.

Perry, E.K., Johnson, M., Ekonomou, A., Perry, R.H., Ballard, C., and Attems, J. (2012). Neurogenic abnormalities in Alzheimer's disease differ between stages of neurogenesis and are partly related to cholinergic pathology. *Neurobiol. Dis.* *47*, 155–162.

Pineda, J.R., and Encinas, J.M. (2016). The contradictory effects of neuronal hyperexcitation on adult hippocampal neurogenesis. *Front. Neurosci.* *10*, 74.

Qi, C., Zhang, J., Chen, X., Wan, J., Wang, J., Zhang, P., and Liu, Y. (2017). Hypoxia stimulates neural stem cell proliferation by increasing HIF-1 $\alpha$  expression and activating Wnt/ $\beta$ -catenin signaling. *Cell. Mol. Biol. (Noisy-le-grand)* *63*, 12–19.

Qiu, J., Takagi, Y., Harada, J., Topalkara, K., Wang, Y., Sims, J.R., Zheng, G., Huang, P., Ling, Y., and Scadden, D.T. (2009). p27Kip1 constrains proliferation of neural progenitor cells in adult brain under homeostatic and ischemic conditions. *Stem Cells* *27*, 920–927.



- Revest, J.M., Dupret, D., Koehl, M., Funk-Reiter, C., Grosjean, N., Piazza, P.V., and Abrous, D.N. (2009). Adult hippocampal neurogenesis is involved in anxiety-related behaviors. *Mol. Psychiatry* *14*, 959–967.
- Roitbak, T., Li, L., and Cunningham, L.A. (2008). Neural stem/progenitor cells promote endothelial cell morphogenesis and protect endothelial cells against ischemia via HIF-1 $\alpha$ -regulated VEGF signaling. *J. Cereb. Blood Flow Metab.* *28*, 1530–1542.
- Roitbak, T., Surviladze, Z., and Cunningham, L.A. (2011). Continuous expression of HIF-1 $\alpha$  in neural stem/progenitor cells. *Cell. Mol. Neurobiol.* *31*, 119–133.
- Rossant, J., Zirngibl, R., Cado, D., Shago, M., and Giguère, V. (1991). Expression of a retinoic acid response element-hsplacZ transgene defines specific domains of transcriptional activity during mouse embryogenesis. *Genes Dev.* *5*, 1333–1344.
- Rosselot, C., Spraggon, L., Chia, I., Batourina, E., Riccio, P., Lu, B., Niederreither, K., Dolle, P., Duyster, G., Chambon, P., et al. (2010). Non-cell-autonomous retinoid signaling is crucial for renal development. *Development* *137*, 283–292.
- Roybon, L., Hjalt, T., Stott, S., Guillemot, F., Li, J.-Y., and Brundin, P. (2009). Neurogenin2 directs granule neuroblast production and amplification while neuroD1 specifies neuronal fate during hippocampal neurogenesis. *PLoS One* *4*, e4779.
- Schänzer, A., Wachs, F.-P., Wilhelm, D., Acker, T., Cooper-Kuhn, C., Beck, H., Winkler, J., Aigner, L., Plate, K.H., and Kuhn, H.G. (2004). Direct stimulation of adult neural stem cells in vitro and neurogenesis in vivo by vascular endothelial growth factor. *Brain Pathol.* *14*, 237–248.
- Segi-Nishida, E., Warner-Schmidt, J.L., and Duman, R.S. (2008). Electroconvulsive seizure and VEGF increase the proliferation of neural stem-like cells in rat hippocampus. *Proc. Natl. Acad. Sci. USA* *105*, 11352–11357.
- Shearer, K.D., Stoney, P.N., Morgan, P.J., and McCaffery, P.J. (2012). A vitamin for the brain. *Trends Neurosci.* *35*, 733–741.
- Shudo, K., Fukasawa, H., Nakagomi, M., and Yamagata, N. (2009). Towards retinoid therapy for Alzheimer's disease. *Curr. Alzheimer Res.* *6*, 302–311.
- Silva-Vargas, V., Maldonado-Soto, A.R., Mizrak, D., Codega, P., and Doetsch, F. (2016). Age-dependent niche signals from the choroid plexus regulate adult neural stem cells. *Cell Stem Cell* *19*, 643–652.
- Stoney, P.N., and McCaffery, P. (2016). A vitamin on the mind: new discoveries on control of the brain by vitamin A. *World Rev. Nutr. Diet.* *115*, 98–108.
- Suh, H., Deng, W., and Gage, F.H. (2009). Signaling in adult neurogenesis. *Annu. Rev. Cell Dev. Biol.* *25*, 253–275.
- Suh, H., Consiglio, A., Ray, J., Sawai, T., D'Amour, K.A., and Gage, F.H. (2007). In vivo fate analysis reveals the multipotent and self-renewal capacities of SOX2(+) neural stem cells in the adult hippocampus. *Cell Stem Cell* *1*, 515–528.
- Takamura, R., Watamura, N., Nikkuni, M., and Ohshima, T. (2017). All-trans retinoic acid improved impaired proliferation of neural stem cells and suppressed microglial activation in the hippocampus in an Alzheimer's mouse model. *J. Neurosci. Res.* *95*, 897–906.
- van Praag, H., Schinder, A.F., Christie, B.R., Toni, N., Palmer, T.D., and Gage, F.H. (2002). Functional neurogenesis in the adult hippocampus. *Nature* *415*, 1030–1034.
- Villeda, S.A., and Wyss-Coray, T. (2013). The circulatory systemic environment as a modulator of neurogenesis and brain aging. *Autoimmun. Rev.* *12*, 674–677.
- Villeda, S.A., Plambeck, K.E., Middeldorp, J., Castellano, J.M., Mosher, K.I., Luo, J., Smith, L.K., Bieri, G., Lin, K., Berdnik, D., et al. (2014). Young blood reverses age-related impairments in cognitive function and synaptic plasticity in mice. *Nat. Med.* *20*, 659–663.
- Villeda, S.A., Luo, J., Mosher, K.I., Zou, B., Britschgi, M., Bieri, G., Stan, T.M., Fainberg, N., Ding, Z., Eggel, A., et al. (2011). The ageing systemic milieu negatively regulates neurogenesis and cognitive function. *Nature* *477*, 90–94.
- von Bohlen und Halbach, O. (2011). Immunohistological markers for proliferative events, gliogenesis, and neurogenesis within the adult hippocampus. *Cell Tissue Res.* *345*, 1–19.
- Wagner, E., Luo, T., and Dräger, U.C. (2002). Retinoic acid synthesis in the postnatal mouse brain marks distinct developmental stages and functional systems. *Cereb. Cortex* *12*, 1244–1253.
- Wang, T.W., Zhang, H., and Parent, J.M. (2005). Retinoic acid regulates postnatal neurogenesis in the murine subventricular zone-olfactory bulb pathway. *Development* *132*, 2721–2732.
- Wirth, J.P., Petry, N., Tanumihardjo, S.A., Rogers, L.M., McLean, E., Greig, A., Garrett, G.S., Klemm, R.D., and Rohner, F. (2017). Vitamin A supplementation programs and country-level evidence of vitamin A deficiency. *Nutrients* *9*. <https://doi.org/10.3390/nu9030190>.
- Xu, X., Li, C., Gao, X., Xia, K., Guo, H., Li, Y., Hao, Z., Zhang, L., Gao, D., Xu, C., et al. (2017). Excessive UBE3A dosage impairs retinoic acid signaling and synaptic plasticity in autism spectrum disorders. *Cell Res.* *28*, 48–68.



**Stem Cell Reports, Volume 10**

**Supplemental Information**

**Retinoic Acid Is Required for Neural Stem and Progenitor Cell Proliferation in the Adult Hippocampus**

**Swati Mishra, Kathleen K. Kelly, Nicole L. Rumian, and Julie A. Siegenthaler**

## SUPPLEMENTAL MATERIALS AND METHODS

**Cell Cycle Analysis.** Cell cycle length ( $T_C$ ), S phase length ( $T_S$ ) and estimated lengths of cell cycle phases G2/M and G1 were calculated using previously described methods (Brandt et al., 2012). Briefly, to measure S phase length ( $T_S$ ), IdU was injected ip followed by ip injection of CldU, with an inter-injection interval of 3h. For measurement of  $T_C$ , IdU was injected ip followed by CldU with an inter-injection interval of 20h. G1 and G2/M phase lengths were estimated as described (Brandt et al., 2014; Fischer et al., 2014). For cell cycle exit, mice were injected with EdU either 24 hours (stem cells) or 28 hours (progenitor cells) prior to harvest. Brain sections were immunolabeled to detect EdU and Ki67, a cell cycle marker. Exited cells were identified as  $\text{Edu}^+$  and  $\text{Ki67}^-$ . Percentage of cell cycle exit was calculated as  $\text{Edu}^+/\text{Ki67}^- \div \text{total Edu}^+$  cells. For S phase re-entry, mice were injected with IdU and 24 hours (stem cells) or 28 hours (progenitor cells) later with CldU. Forty-five minutes later, brains were harvested and sections were immunostained for CldU and IdU. Percentage of S phase re-entry was calculated as  $\text{CldU}^+\text{IdU}^+ \div \text{total IdU}^+$  cells. CldU was detected using rat anti-BrdU (Novus Biologicals) and IdU was detected using mouse anti-BrdU (BD Biosciences). CldU and IdU can be detected simultaneously using these antibodies without cross reactivity (Aten et al., 1992; Vega and Peterson, 2005; Brandt et al., 2012). Each cell cycle parameter was determined for separate stem and progenitor cell types (stem cells:  $\text{Sox2}^+/\text{GFAP}^+$ ; intermediate progenitors:  $\text{Tbr2}^+$  cells; neuroblasts:  $\text{DCX}^+$  cells).

**ELISA analysis.** To analyze VEGFA and HIF1 $\alpha$  protein levels *in vitro* or *in vivo*, cells or whole hippocampal tissue were collected in RIPA buffer (#R0278, Sigma) containing a protease inhibitor cocktail tablet. Total protein concentrations were determined using the BCA protein assay. VEGFA and HIF1 $\alpha$  protein levels were determined using VEGFA ELISA kit and HIF1 $\alpha$

ELISA kit, respectively according to manufacturer's instructions. All represented proteins levels are normalized to respective total protein concentrations. For animal studies, we analyzed 3 animals (n=3) per treatment condition or genotype for ELISA experiments. For NSC culture studies, three independent experiments (n=3) were analyzed for all treatments.

**Quantitative real-time PCR analysis.** RNA isolation from cultured cells and whole hippocampal tissue was performed using RNeasy Micro Kit and RNeasy plus Mini Kit, respectively. RNA concentration was determined using UV spectrophotometer and 100ng of RNA was reverse-transcribed using Bio-Rad iScript cDNA synthesis kit according to manufacturer's instructions. cDNA was amplified using iScript One-Step RT-PCR kit with SYBR Green (Bio-Rad). A 12.5  $\mu$ l reaction volume containing 6.25  $\mu$ l of the SYBR Green PCR, 200nM of each primer was run, using the CFX Connect™ Real-Time PCR Detection System (Bio-Rad). The amplification program consisted of initial denaturation at 95°C for 3 minutes followed by 39 cycles of 95°C for 10 seconds and annealing at 60°C for 30 seconds. For animal studies, 3 animals (n=3) per treatment condition or genotype were analyzed. For NSC culture studies, three independent experiments (n=3) were analyzed for all treatments.

**Primer sequences for RT-PCR experiments.** Primers used are as follows: *Vegfa*, sense 5'- CAG GCT GCT GTA ACG ATG AA- 3' and antisense 5'- TTT GAC CCT TTC CCT TTC CT- 3'; *Hif1a*, sense 5'- ACC TTC ATC GGA AAC TCC AAA G-3' and antisense 5'- CTG TTA GGC TGG GAA AAG TTA -3 ; *Rara*, sense 5'- AGC TCT GCG TTG TGC AGA TCT - 3' and antisense 5'- AGA GTG TCC AAG CCC TCA GA - 3'; *Rarb*, sense 5'- TTC AAA GCA GGA ATG CAC AG -3' and antisense 5'- GGC AAA GGT GAA CAC AAG GT-3 ; *Rarg*, sense 5'- CAC AGC CTG CCA GTC TAC AA - 3' and antisense 5'- CTG GCA GAG TGA GGG AAA AG - 3'; *Rxra*, sense 5'- CTG CCG CTC GAC TTC TCT AC -3' and antisense 5'- ATA TTT

CCT GAG GGA TGG GC -3 ; *Rxrb*, sense 5'- TGG GGG TGA GAA AAG AGA TG -3' and antisense 5'- GAG CGA CAC TGT GGA GTT GA -3 ; *Rxrg*, sense 5'- AAT GCT CTT GGC TCT CCG TA -3' and antisense 5'- TGA AGA AGC CTT TGC AAC CT -3; *Ccdn1* sense 5'- GCG TAC CCT GAC ACC AAT CTC-3' and antisense 5'- ACT TGA AGT AAG ATA CGG AGG GC-3 ; *Ccdn2* sense 5'- ACC TCC GCG AGT GTT CCT ATT-3' and antisense 5'-CAC AGA CCT CTA GCA TCC AGG-3 ; *Cdk4* sense 5'- TCA GCA CAG TTC GTG AGG TG-3' and antisense 5'-TCC ATC AGC CGT ACA ACA TTG-3 ; *Cdk6* sense 5'-TGG ACA TCA TTG GAC TCC CAG-3' and antisense 5'-TCG ATG GGT TGA GCA GAT TTG-3 ; *Cdkn1a* sense 5'- TCT CTT CGG CCC CGT CAA-3' and antisense 5'-AAA TTC CAC TTG CGC TGA CTC-3 ; *Cdkn1b* sense 5'-CCT GGT GAT GTC CGA CCT-3' and antisense 5'-CCA TGA GCG CAT CGC AAT C-3.

***Actinomycin D assay.*** For the transcriptional inhibition assays, rat NSCs were seeded onto 6-well plates and treated with actinomycin D (1 $\mu$ M) (Huang et al., 2010). Inhibitor was applied 30 minutes before treating cells with RA, pan- RAR antagonist or both for 24h. Post treatment, cell lysates were collected for gene and protein analysis. ELISA was performed to detect HIF1 $\alpha$  protein levels (see 'Supplementary information' for methods). RNA isolation and quantitative real-time PCR analysis (see 'Supplementary information' for methods and primers).

***Hippocampal NSC differentiation into neurons or astrocytes.*** Neural stem cells were seeded onto poly-l-ornithine and laminin coated 24 well plates. Differentiation of neural stem cells was performed using rodent neuron differentiation kit (#SCR035, Millipore). Briefly, cells were grown in neuron differentiation medium composed of neural stem cell basal medium (#SCM003, Millipore) supplemented with inducers of differentiation, 1 $\mu$ M RA and 5  $\mu$ M Forskolin (#344282, Millipore) and cultured according to manufacturer's instructions (Millipore). To

confirm neural differentiation, neurons generated were immunostained with neuron specific antibody, rabbit anti- $\beta$  III tubulin (1:500, #ab18207, Abcam) using immunostaining protocol as described in a previous section.

To generate astrocytes, neural stem cells were seeded onto Geltrex™ Reduced growth factor basement membrane matrix (# 12760, Thermo Scientific) coated 24 well plates in neural stem cell basal medium (#SCM003, Millipore). After 2 days culture medium was changed into astrocyte differentiation medium composed of neural stem cell basal medium (#SCM003, Millipore) supplemented with astrocyte differentiation factors, 50ng/ml BMP4 (-BP-010, R&D Systems), LIF (#LIF1005, Millipore) and 1% heat-inactivated fetal bovine serum (Lonza). Medium was changed every 3-4 days.

Neurons and astrocytes generated *in vitro* were treated with either vehicle (DMSO), RA or RA and pan-RAR antagonist for 24 hours. Cell lysates were then collected and ELISA was performed to measure HIF1 $\alpha$  and VEGFA levels (see ELISA analysis).

## **REFERENCES**

Aten J, Bakker P, Stap J, Boschman G, Veenhof C (1992) DNA double labelling with IdUrd and CldUrd for spatial and temporal analysis of cell proliferation and DNA replication. The Histochemical Journal 24:251-259.

Brandt MD, Hübner M, Storch A (2012) Brief report: Adult hippocampal precursor cells shorten S- phase and total cell cycle length during neuronal differentiation. Stem Cells 30:2843-2847.

Brandt MD, Ellwardt E, Storch A (2014) Short- and long-term treatment with modafinil differentially affects adult hippocampal neurogenesis. Neuroscience 278:267-275.

Fischer TJ, Walker TL, Overall RW, Brandt MD, Kempermann G (2014) Acute effects of wheel

running on adult hippocampal precursor cells in mice are not caused by changes in cell cycle length or S phase length. *Front Neurosci* 8:314.

Huang Y-F, Yang C-H, Huang C-C, Tai M-H, Hsu K-S (2010) Pharmacological and genetic accumulation of hypoxia-inducible factor-1 $\alpha$  enhances excitatory synaptic transmission in hippocampal neurons through the production of vascular endothelial growth factor. *J Neurosci* 30:6080-6093.

Vega CJ, Peterson DA (2005) Stem cell proliferative history in tissue revealed by temporal halogenated thymidine analog discrimination. *Nature Methods* 2:167-169.

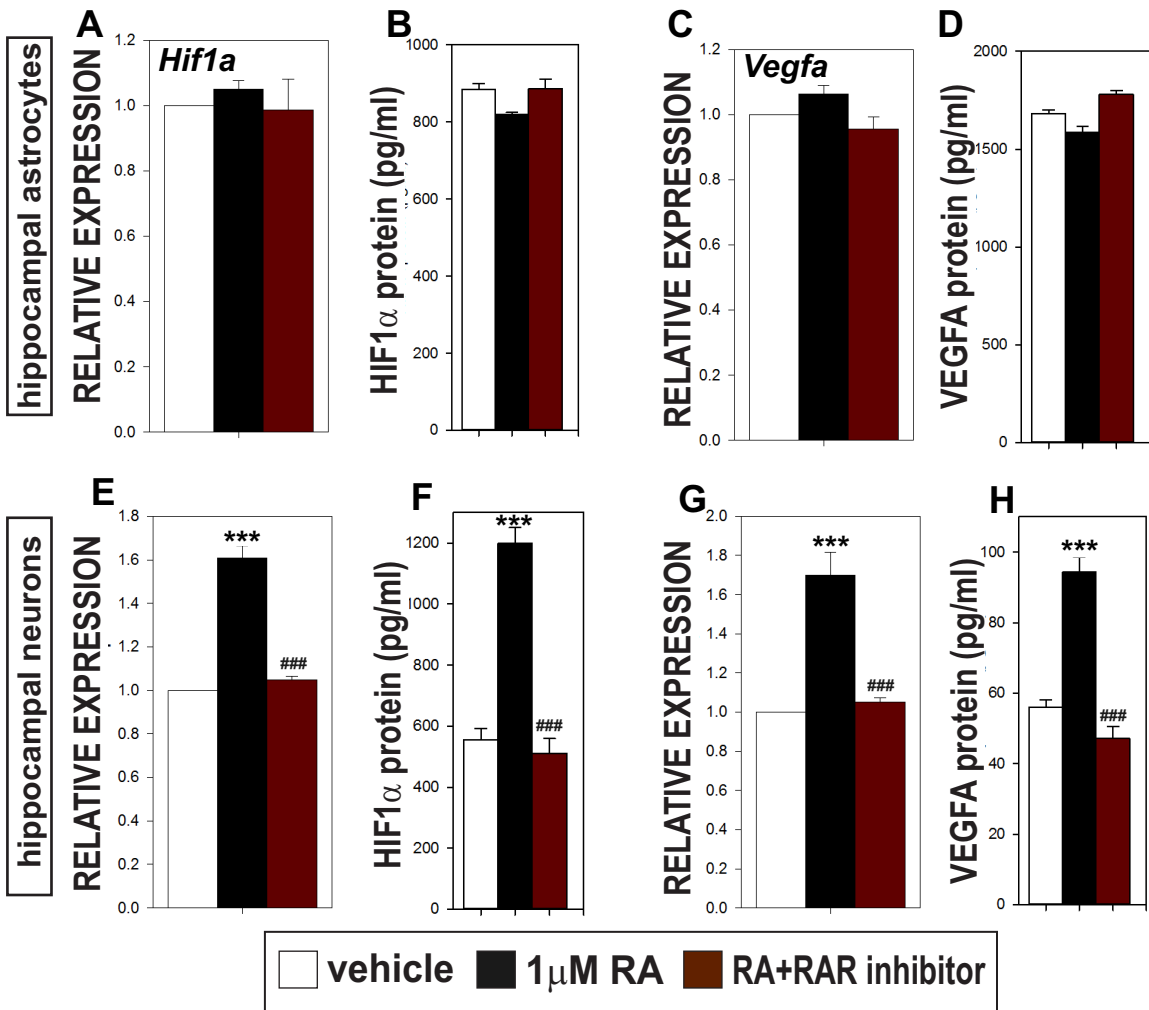

**Figure S1** (related to Fig. 2)

RA increases HIF1A and VEGFA expression in neurons but not in astrocytes *in vitro*. (A-D) In cultured astrocytes differentiated from adult hippocampal NSPCs, RA does not result in a significant difference in *Hif1a* (A) gene or (B) protein expression or significantly alter *Vegfa* (C) gene or (D) protein expression. In neurons differentiated from adult hippocampal NSPCs, RA significantly increases *Hif1a* (E) gene and (F) protein expression as well as *Vegfa* (G) gene or (H) protein expression. Data represented as mean±SEM, \*p≤0.05, \*\*p≤0.01, \*\*\*p≤0.001.

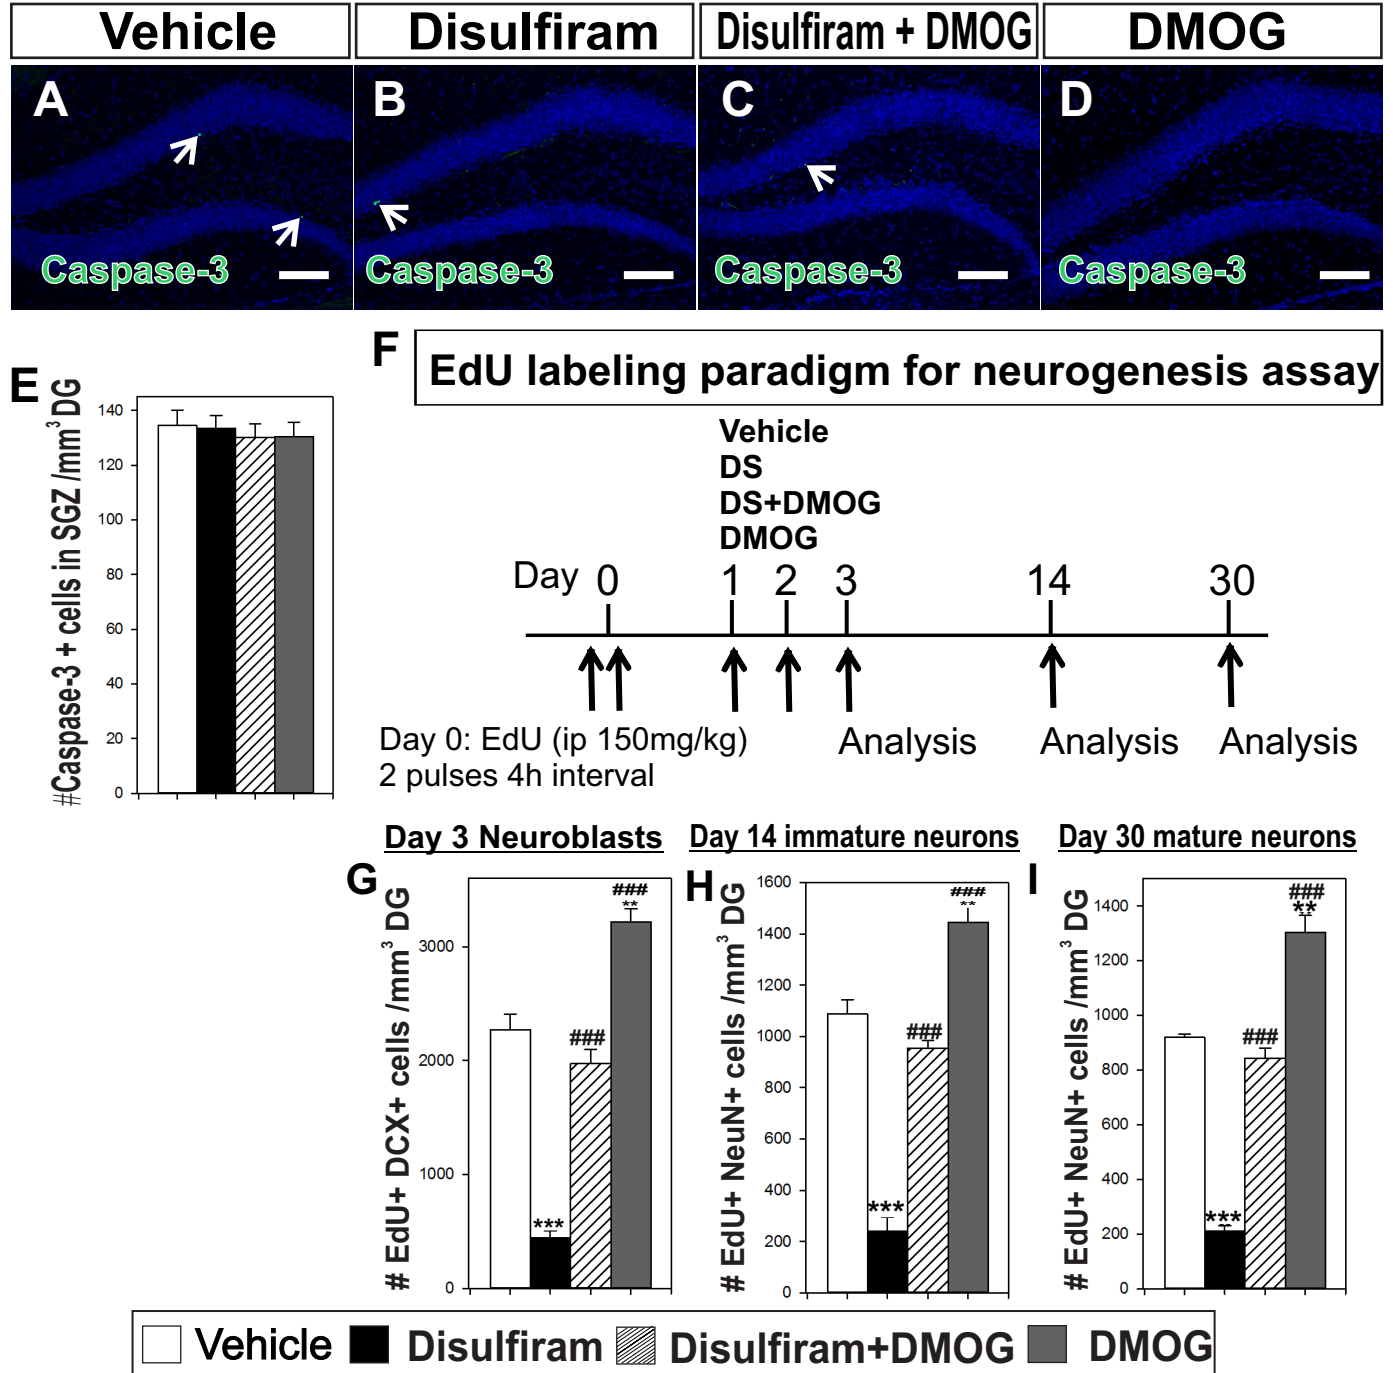

**Figure S2.** (related to Fig. 4)

**A-E.** Cell death, as determined by quantification of cleaved-caspase3+ cells in the DG, was unchanged across all treatments. **F.** Experimental paradigm describing method to quantify neurogenesis. **G-I.** Quantification of new born neuroblasts, immature neurons and mature neurons in the hippocampus across all treatments shows RA-HIF1A pathway regulates adult hippocampal neurogenesis. DG: dentate gyrus, scale bar=100 $\mu$ m, data represented as mean $\pm$ SEM, \* $p$  $\leq$ 0.05, \*\* $p$  $\leq$ 0.01, \*\*\* $p$  $\leq$ 0.001)



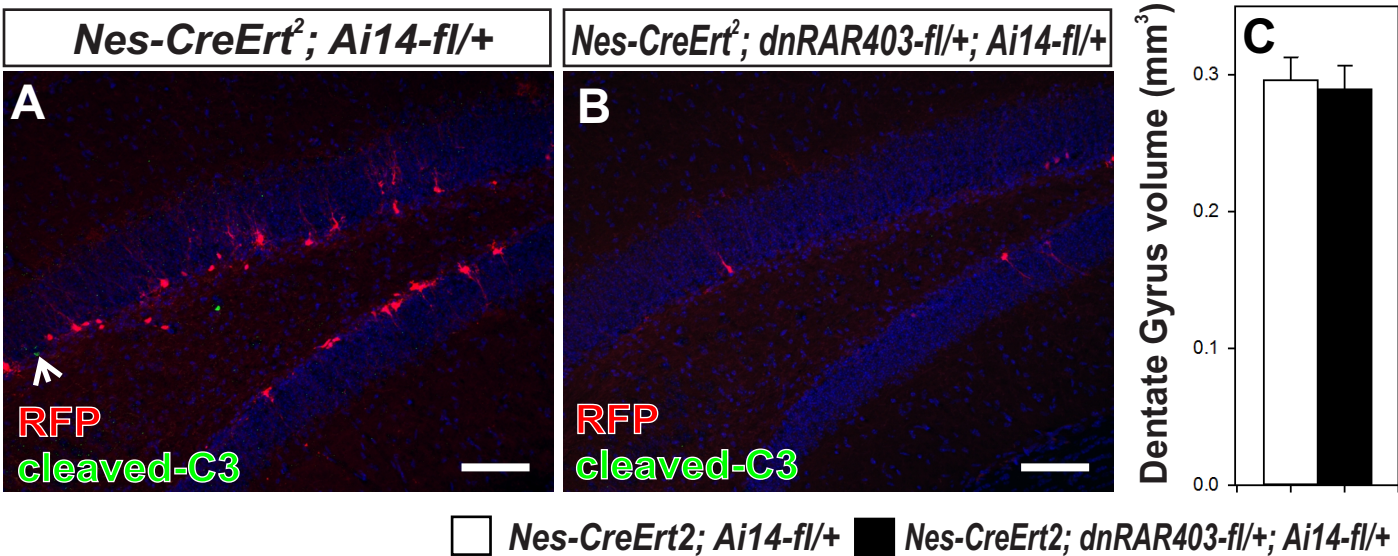

**Figure S3.** (related to Fig. 6,7)

**A-B.** Cell death remains unchanged in controls and mutants as evidenced by similar number of RFP+Cleaved caspase3+ cells in the SGZ **C.** Dentate gyrus volume remains unchanged in controls and mutants. Scale bar=100μm, data represented as mean±SEM.
